# Supplementary material
Source: PubMed Central journal article supplement (PMC8257679)
Supplement: 41416_2021_1323_MOESM1_ESM.pdf [file 41416_2021_1323_MOESM1_ESM.pdf]

## **Supplementary Data**

### **Supplementary Fig. S1 APHINITY study design.**

*HER2* human epidermal growth factor receptor 2, *IV* intravenous

From The New England Journal of Medicine, von Minckwitz G, Procter M, de Azambuja E, Zardavas D, Benyunes M, Viale G, Suter T, Arahmani A, Rouchet N, Clark E, Knott A, Lang I, Levy C, Yardley DA, Bines J, Gelber RD, Piccart M, and Baselga J, for the APHINITY Steering Committee and Investigators, Adjuvant Pertuzumab and Trastuzumab in Early HER2-Positive Breast Cancer, 377, 122–131. Copyright © (2017) Massachusetts Medical Society. Reprinted with permission.

**A Anthracycline-based chemotherapy**

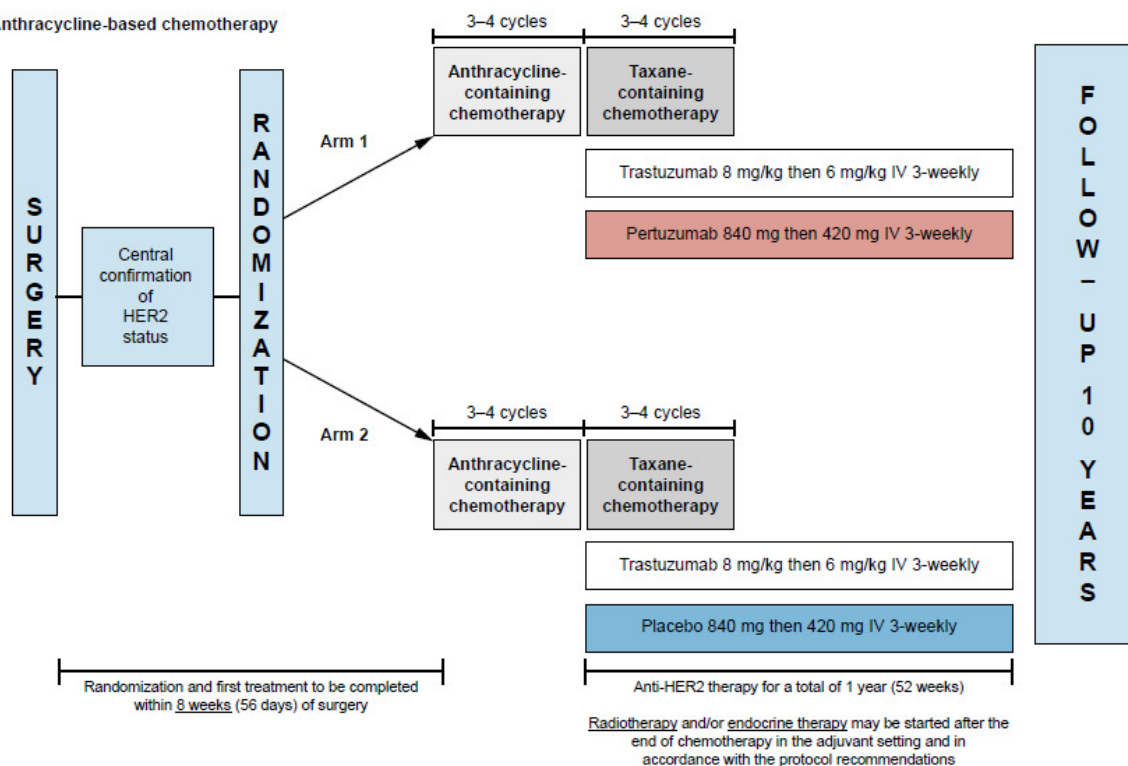

**B Non-anthracycline-based chemotherapy**

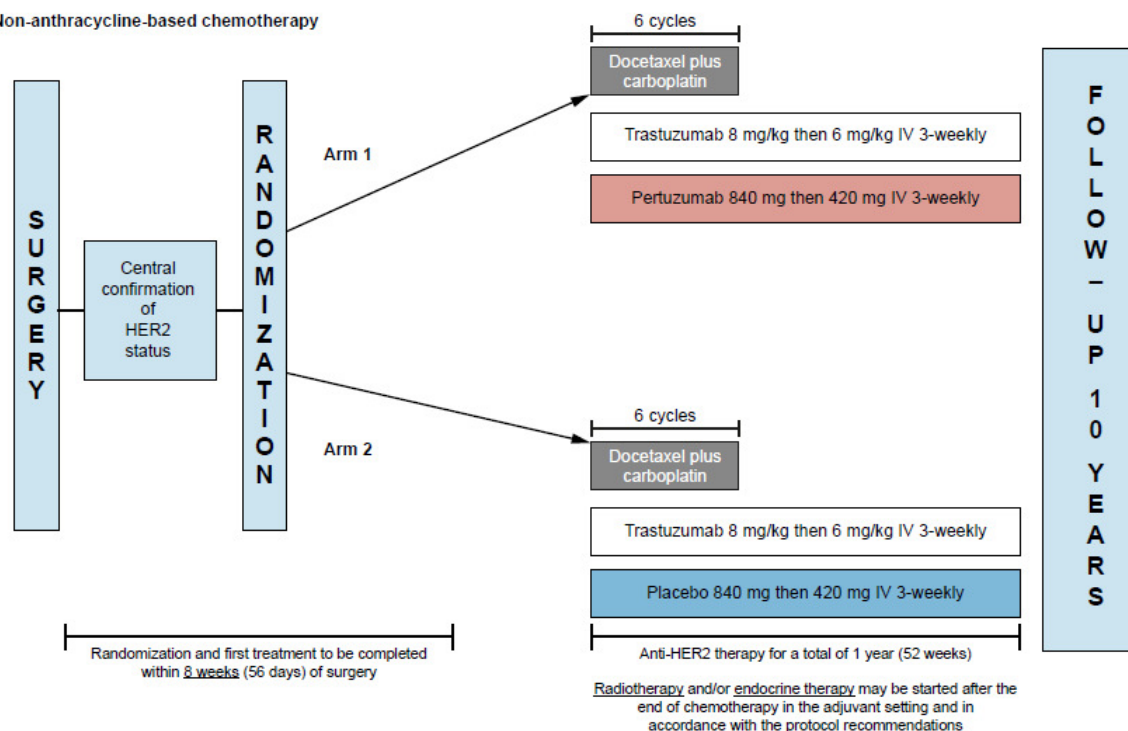

**Supplementary Fig. S2 Mean EORTC QLQ-C30 scores for (A) social functioning, (B) cognitive functioning, and (C) emotional functioning in patients in the pertuzumab plus trastuzumab and chemotherapy arm (solid line) or the placebo plus trastuzumab and chemotherapy arm (dashed line).** Horizontal lines indicate the level at which the change from baseline would be considered clinically meaningful.<sup>12</sup> Higher scores indicate better functioning. Numbers below graphs indicate the number of patients who completed the scale.

<sup>a</sup>For patients receiving anthracycline-based chemotherapy, the actual time point was week 10 or week 13 of HER2-targeted treatment (depending on the chemotherapy regimen given). For patients receiving non-anthracycline-based chemotherapy (i.e., the pertuzumab plus trastuzumab and docetaxel-carboplatin regimen), this was week 19 of HER2-targeted treatment

*EORTC QLQ-C30* European Organisation for Research and Treatment of Cancer Quality of Life Questionnaire, Core module, version 3, *FU* follow-up, *mo* months

**A**

Figure S2A

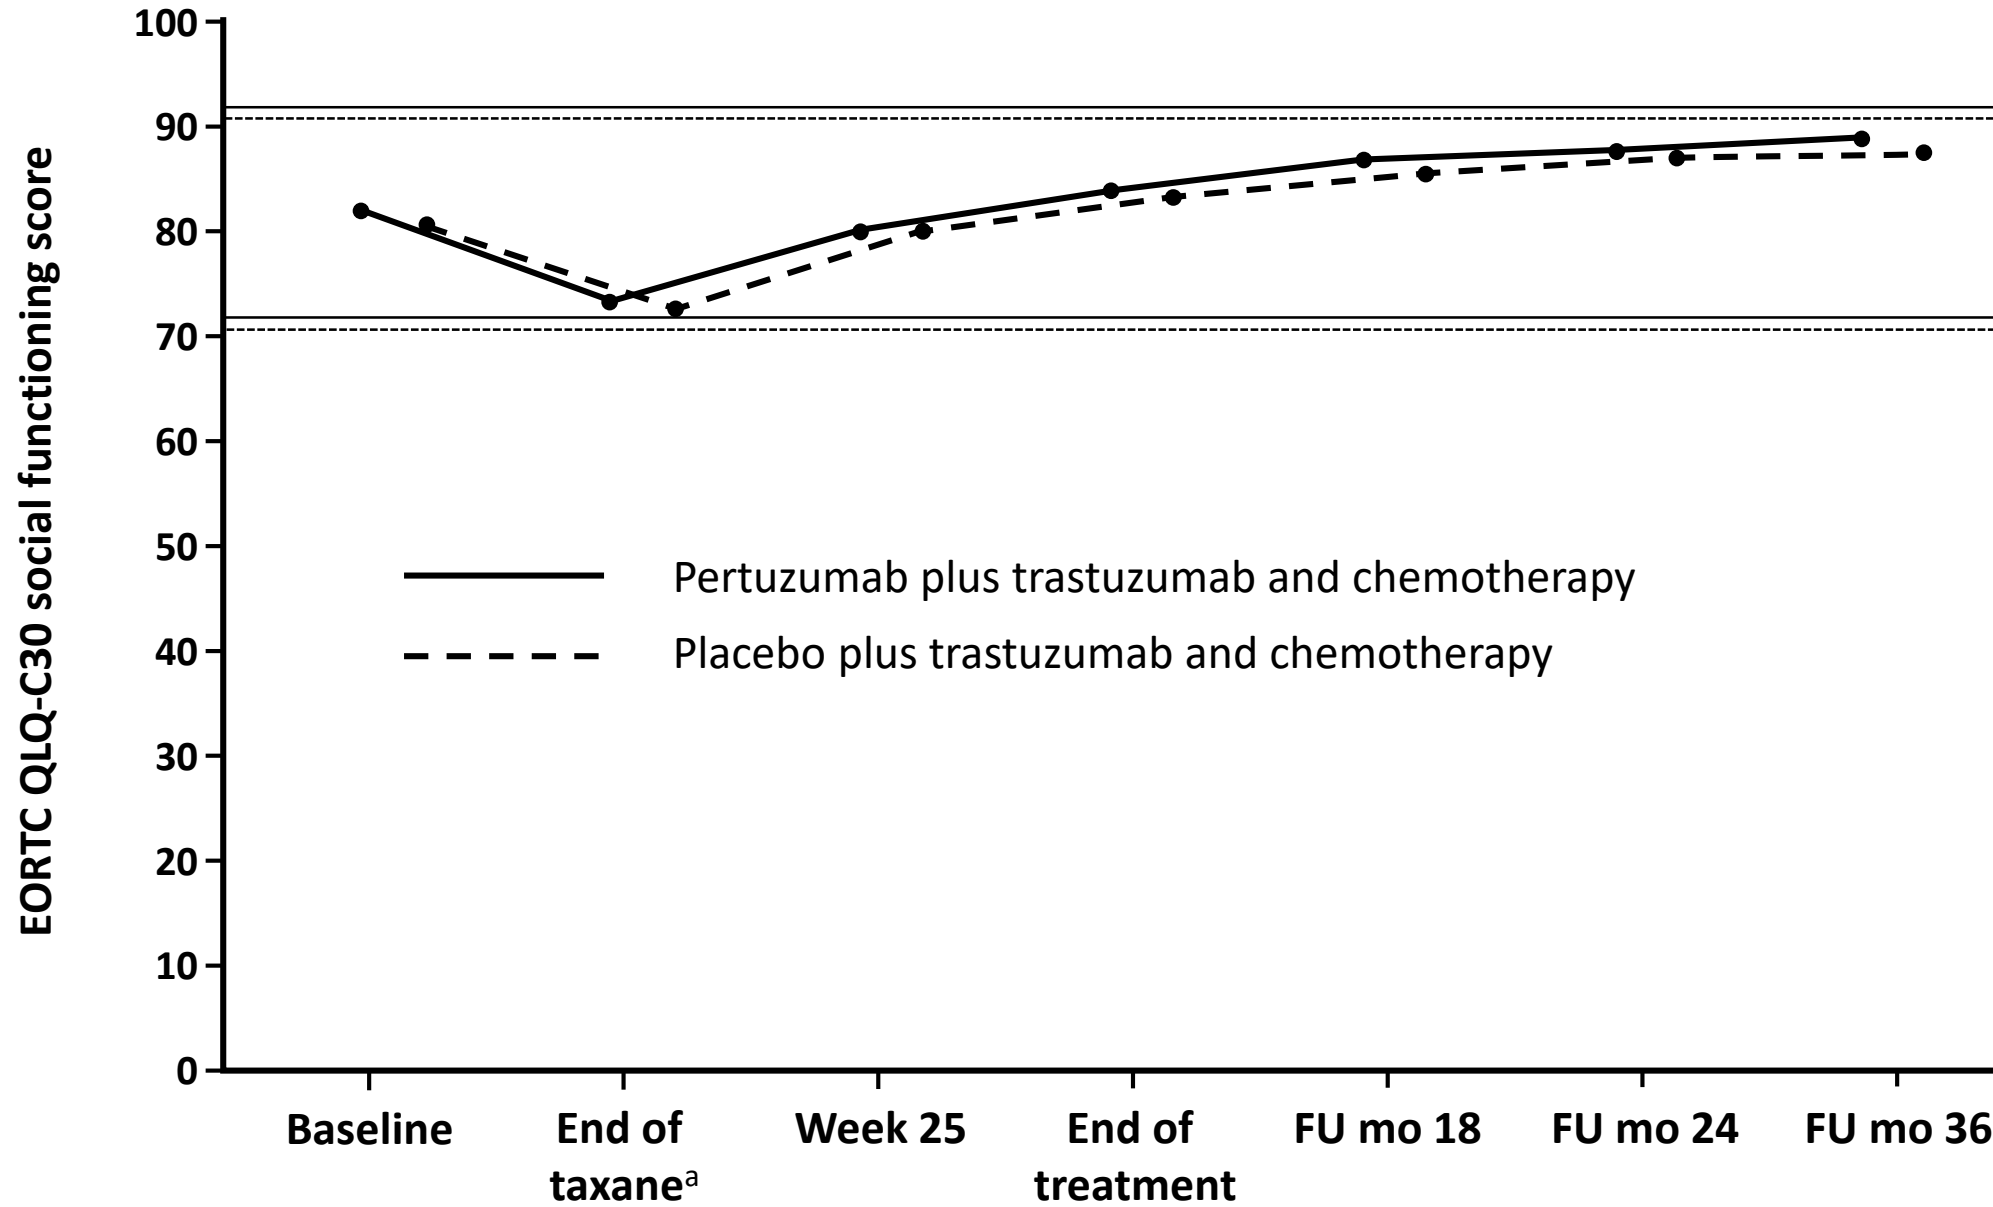**N**

|       |             |             |             |             |             |             |             |
|-------|-------------|-------------|-------------|-------------|-------------|-------------|-------------|
| —     | <b>2332</b> | <b>2116</b> | <b>2091</b> | <b>2312</b> | <b>1955</b> | <b>1898</b> | <b>1855</b> |
| - - - | <b>2336</b> | <b>2162</b> | <b>2122</b> | <b>2340</b> | <b>1953</b> | <b>1905</b> | <b>1825</b> |

**B**

Figure S2B

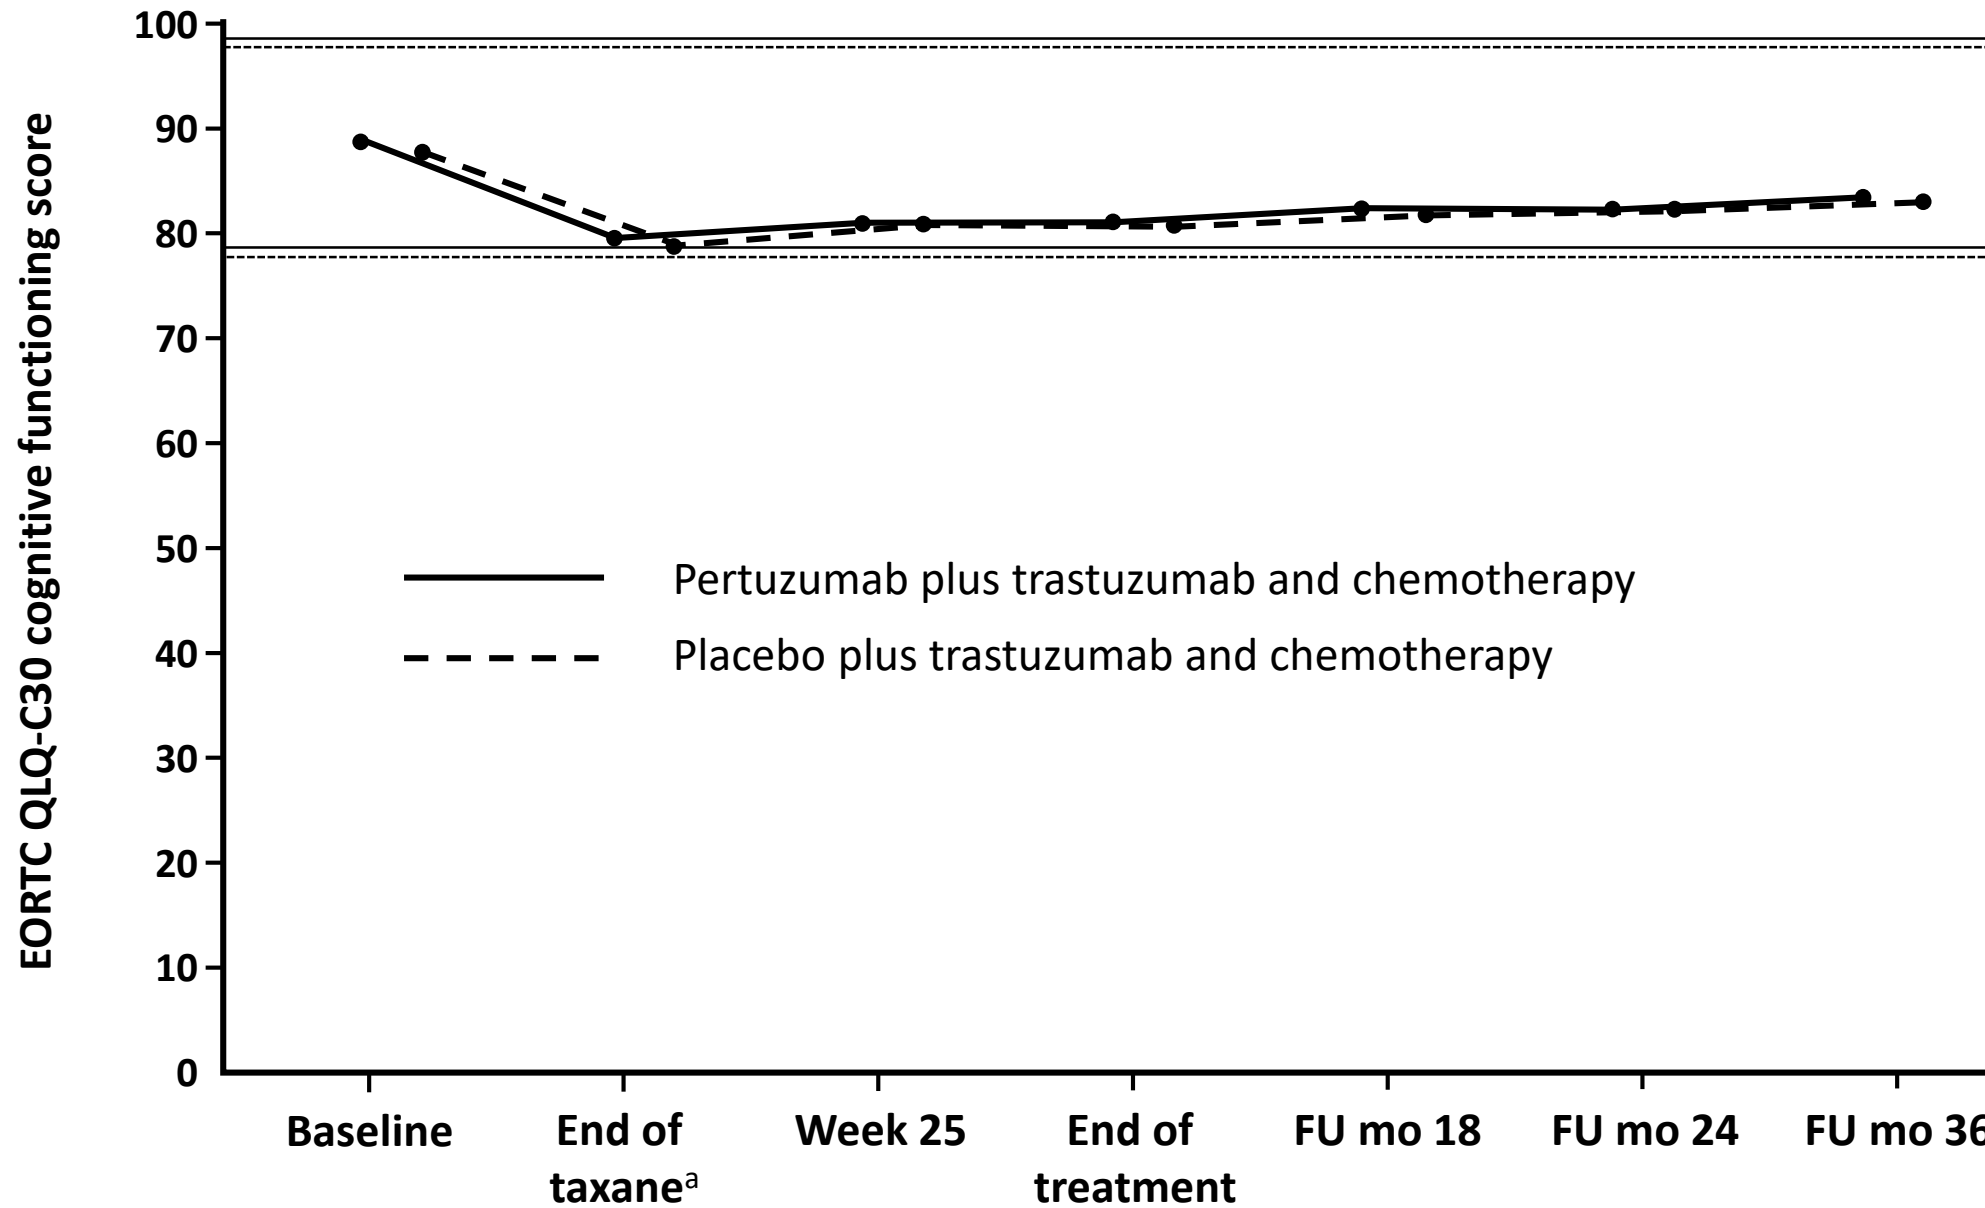

N

|       |             |             |             |             |             |             |             |
|-------|-------------|-------------|-------------|-------------|-------------|-------------|-------------|
| —     | <b>2334</b> | <b>2118</b> | <b>2091</b> | <b>2313</b> | <b>1955</b> | <b>1898</b> | <b>1856</b> |
| - - - | <b>2341</b> | <b>2162</b> | <b>2121</b> | <b>2340</b> | <b>1954</b> | <b>1905</b> | <b>1825</b> |

**C**

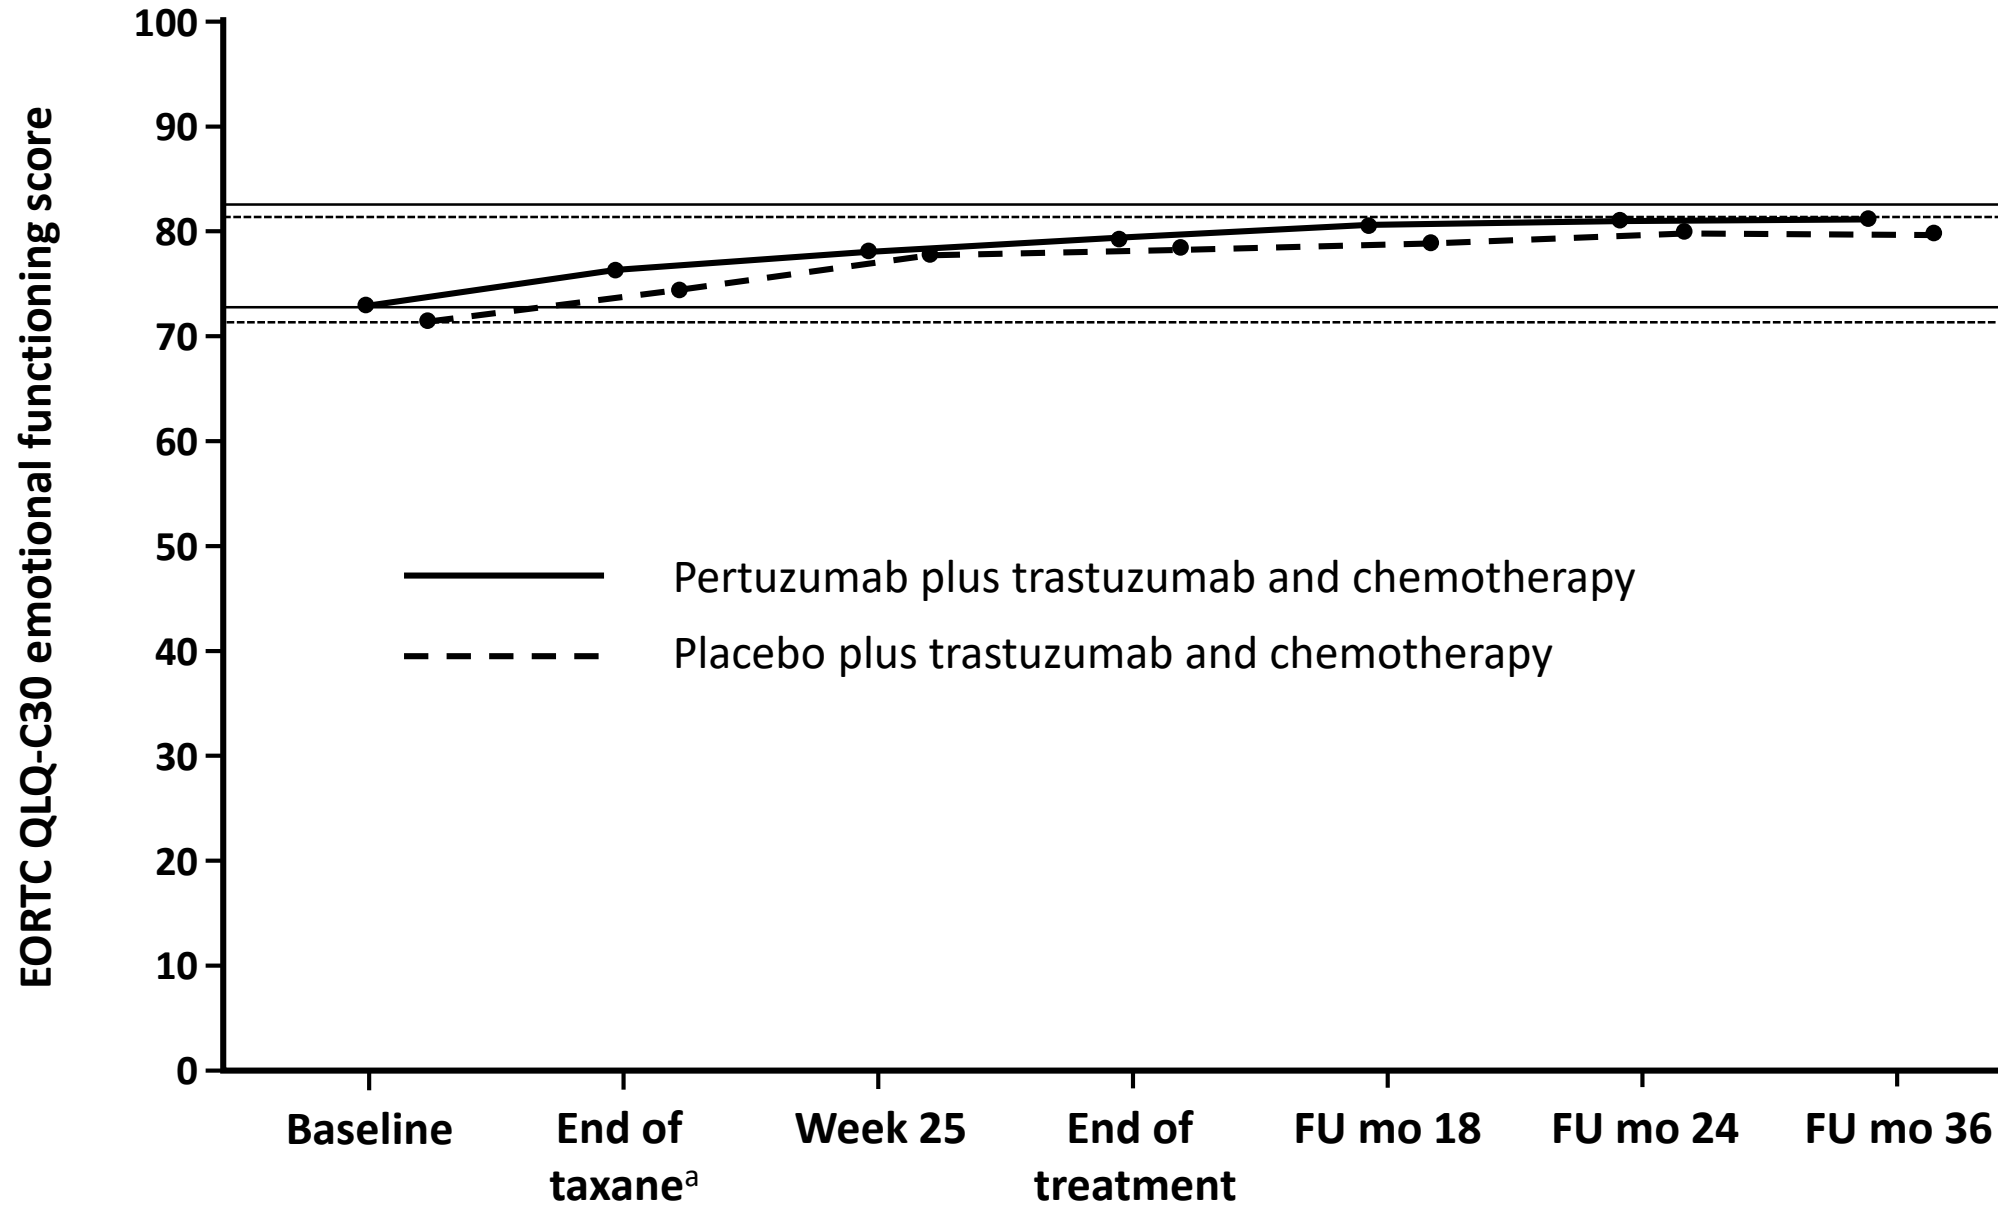

**N**

|       |             |             |             |             |             |             |             |
|-------|-------------|-------------|-------------|-------------|-------------|-------------|-------------|
| —     | <b>2332</b> | <b>2117</b> | <b>2092</b> | <b>2312</b> | <b>1955</b> | <b>1898</b> | <b>1856</b> |
| - - - | <b>2340</b> | <b>2162</b> | <b>2122</b> | <b>2340</b> | <b>1953</b> | <b>1905</b> | <b>1825</b> |

**Supplementary Fig. S3 EORTC QLQ-BR23 scores (change from baseline) for the symptom scales of (A) body image, (B) sexual enjoyment, (C) upset by hair loss, and (D) sexual functioning in patients in the pertuzumab plus trastuzumab and chemotherapy arm (solid line) or the placebo plus trastuzumab and chemotherapy arm (dashed line).** Values outside the shaded area represent clinically meaningful changes,<sup>12</sup> with asterisks indicating time points where there was a clinically meaningful change. Numbers below the graphs represent patients completing the response at each time point. Higher scores indicate a higher level of functioning, except for upset by hair loss, where higher scores indicate worsening in symptoms. The lines are slightly offset to improve visibility, but time points are the same for each arm.

<sup>a</sup>For patients receiving anthracycline-based chemotherapy, the actual time point was week 10 or week 13 of HER2-targeted treatment (depending on the chemotherapy regimen given). For patients receiving non-anthracycline-based chemotherapy (i.e., the pertuzumab plus trastuzumab and docetaxel-carboplatin regimen), this was week 19 of HER2-targeted treatment

*EORTC QLQ-BR23* European Organisation for Research and Treatment of Cancer Quality of Life Questionnaire, Breast module, *FU* follow-up, *mo* months

**A**

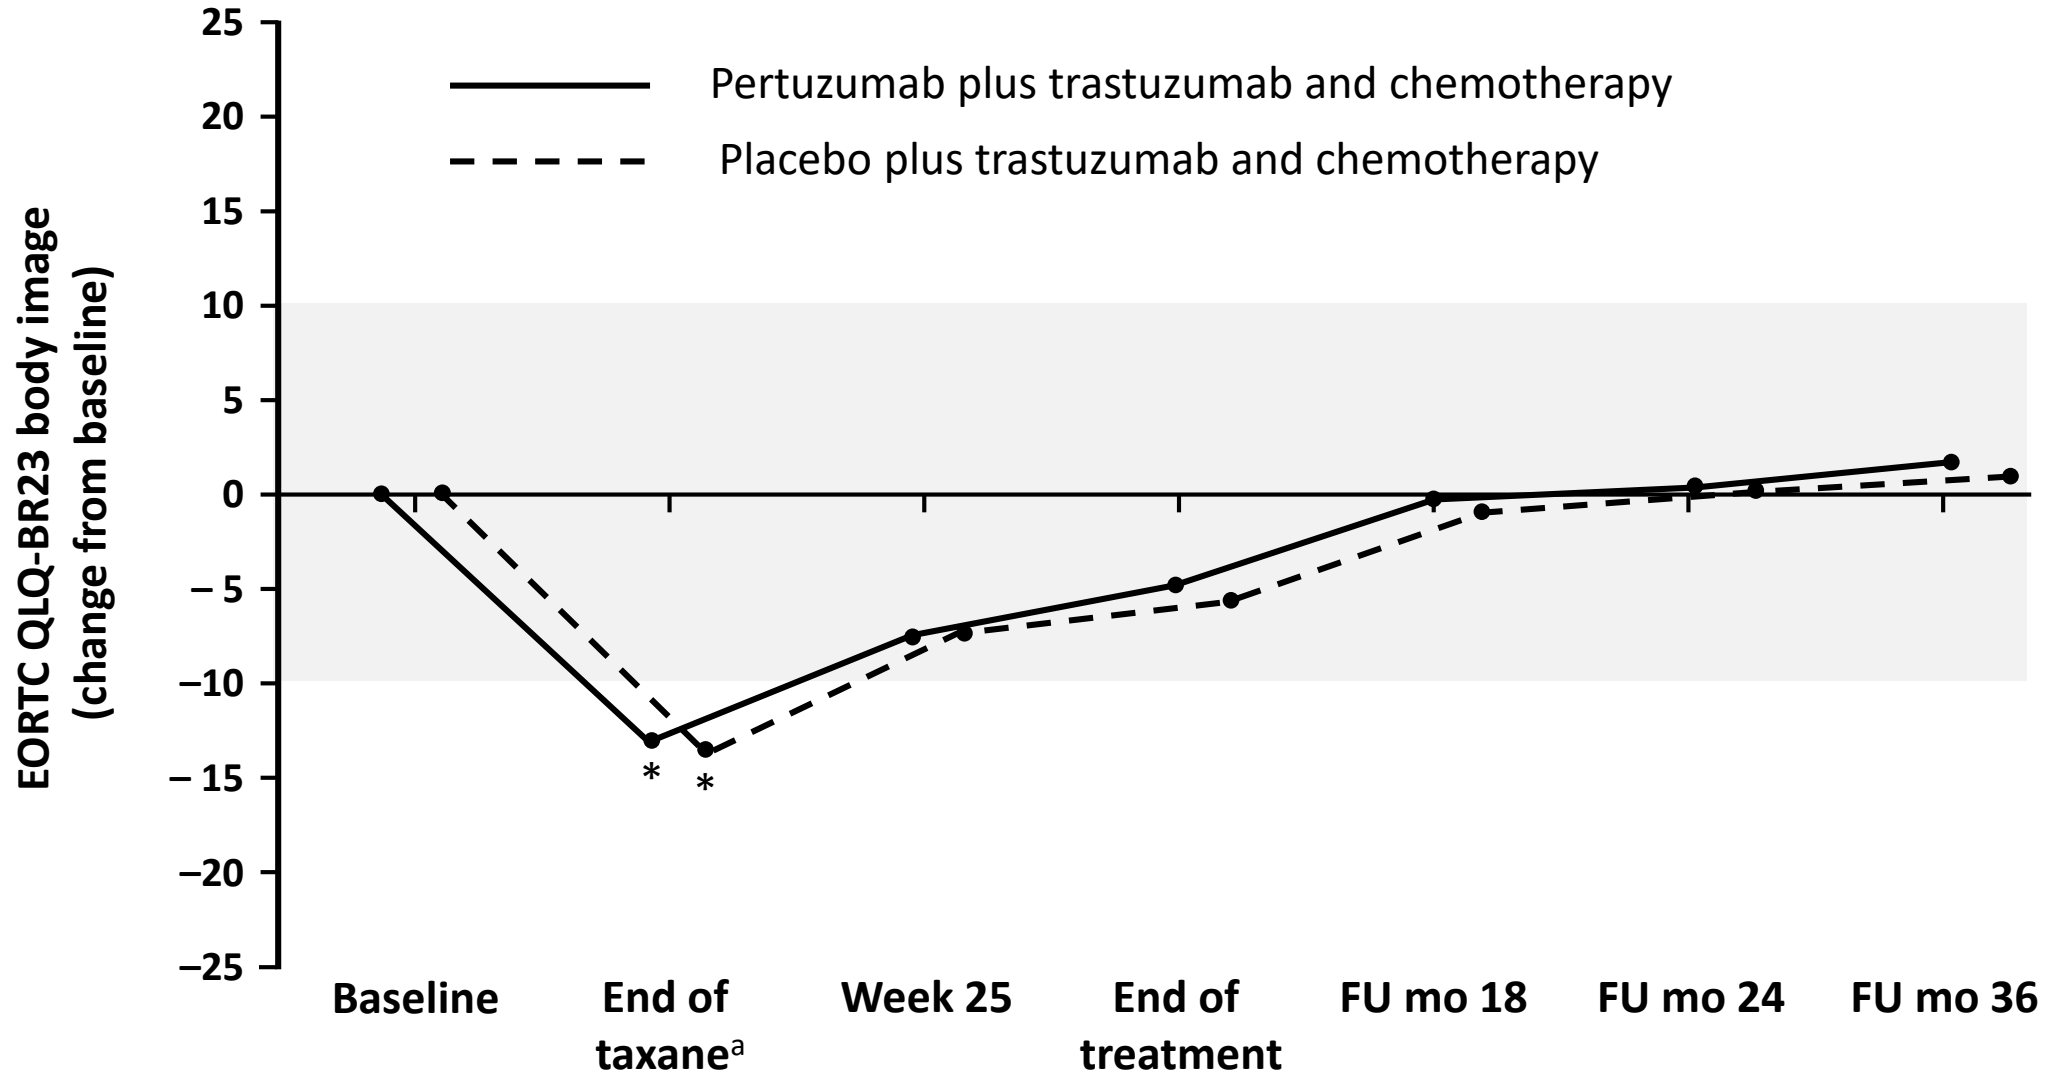

**N**

|       |             |             |             |             |             |             |             |
|-------|-------------|-------------|-------------|-------------|-------------|-------------|-------------|
| —     | <b>2313</b> | <b>2048</b> | <b>2020</b> | <b>2237</b> | <b>1887</b> | <b>1839</b> | <b>1789</b> |
| - - - | <b>2317</b> | <b>2086</b> | <b>2050</b> | <b>2261</b> | <b>1889</b> | <b>1852</b> | <b>1758</b> |



**B**

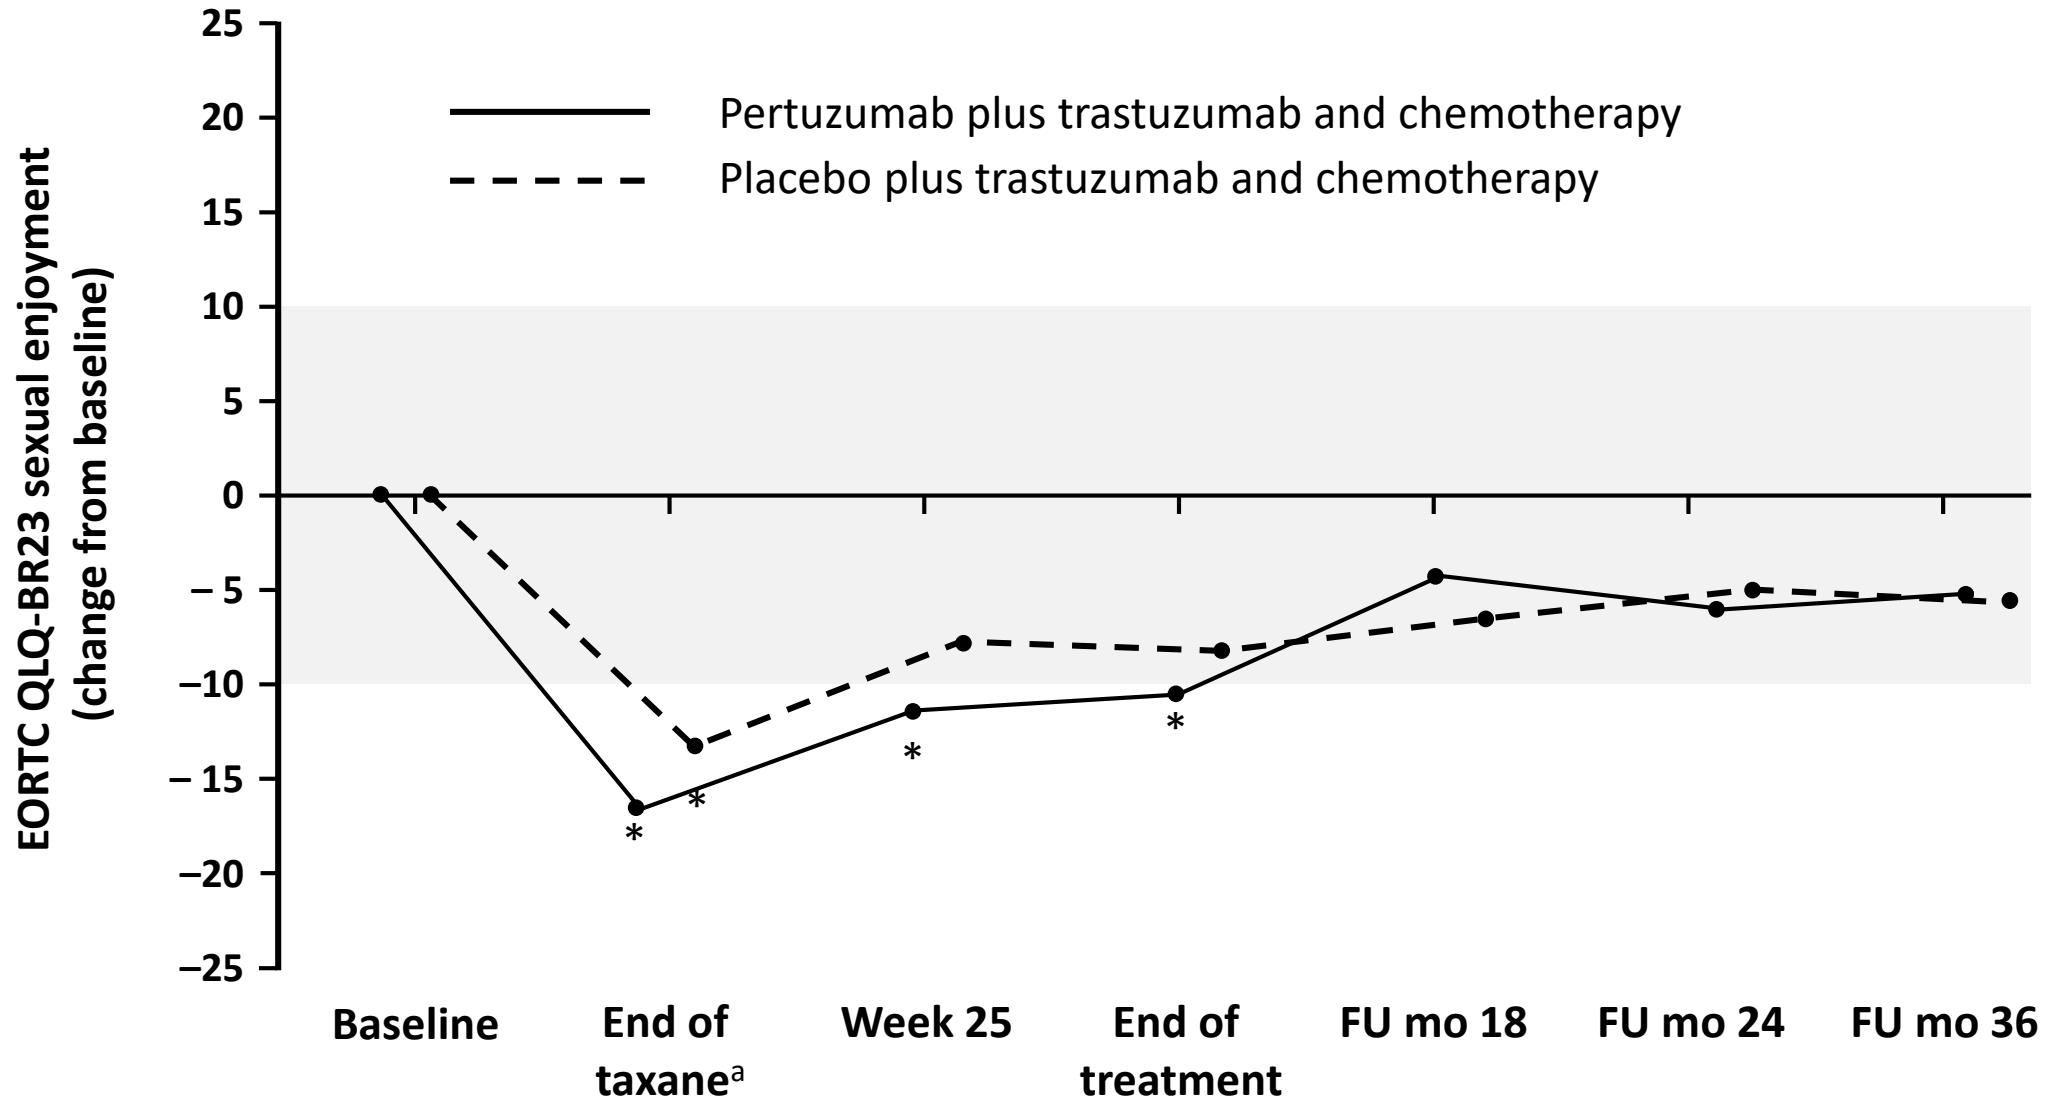

**N**

|       |     |     |     |     |     |     |     |
|-------|-----|-----|-----|-----|-----|-----|-----|
| —     | 966 | 530 | 558 | 781 | 585 | 576 | 530 |
| - - - | 997 | 553 | 630 | 820 | 581 | 561 | 541 |

**C**

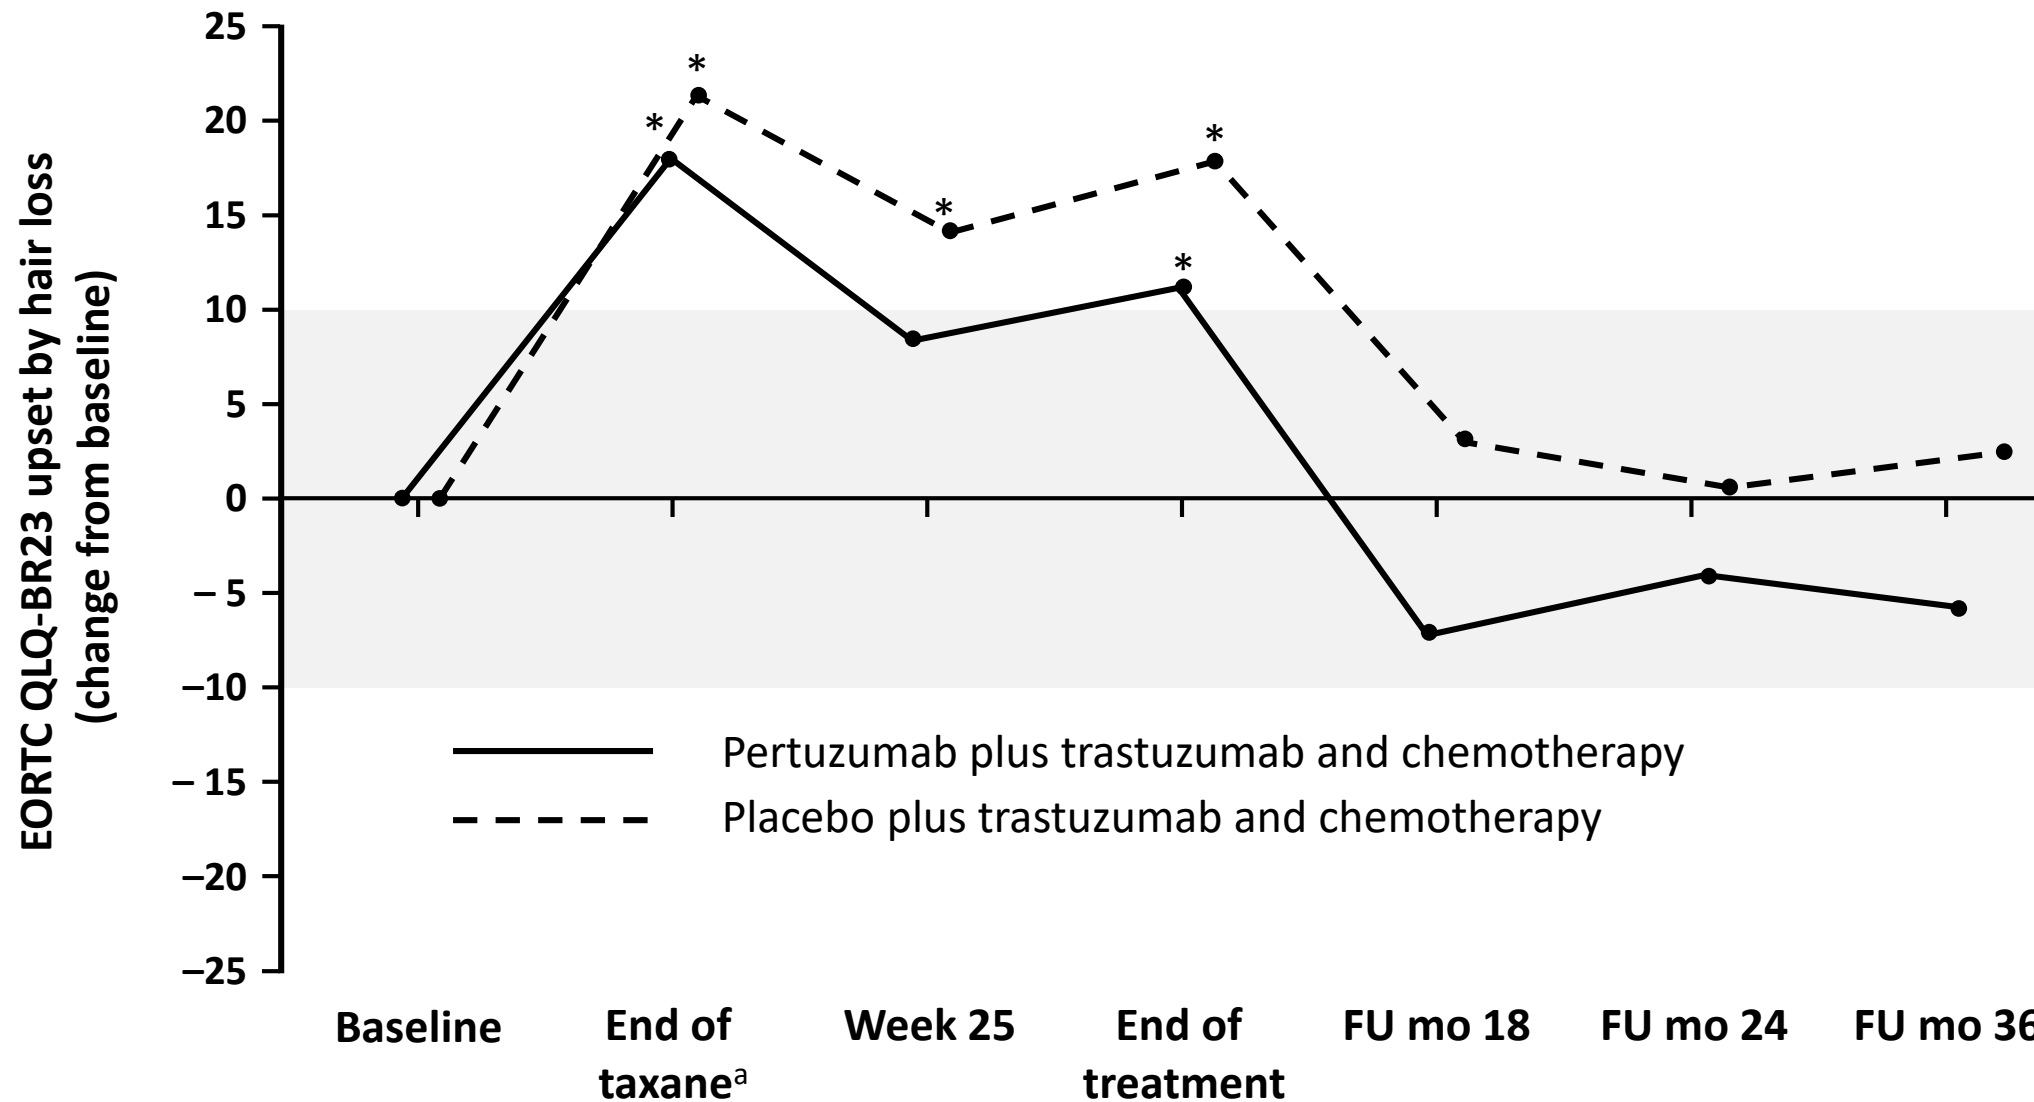

**N**

|       |            |            |            |            |            |           |            |
|-------|------------|------------|------------|------------|------------|-----------|------------|
| —     | <b>356</b> | <b>208</b> | <b>100</b> | <b>297</b> | <b>71</b>  | <b>73</b> | <b>95</b>  |
| - - - | <b>340</b> | <b>206</b> | <b>101</b> | <b>290</b> | <b>104</b> | <b>92</b> | <b>111</b> |

**D**

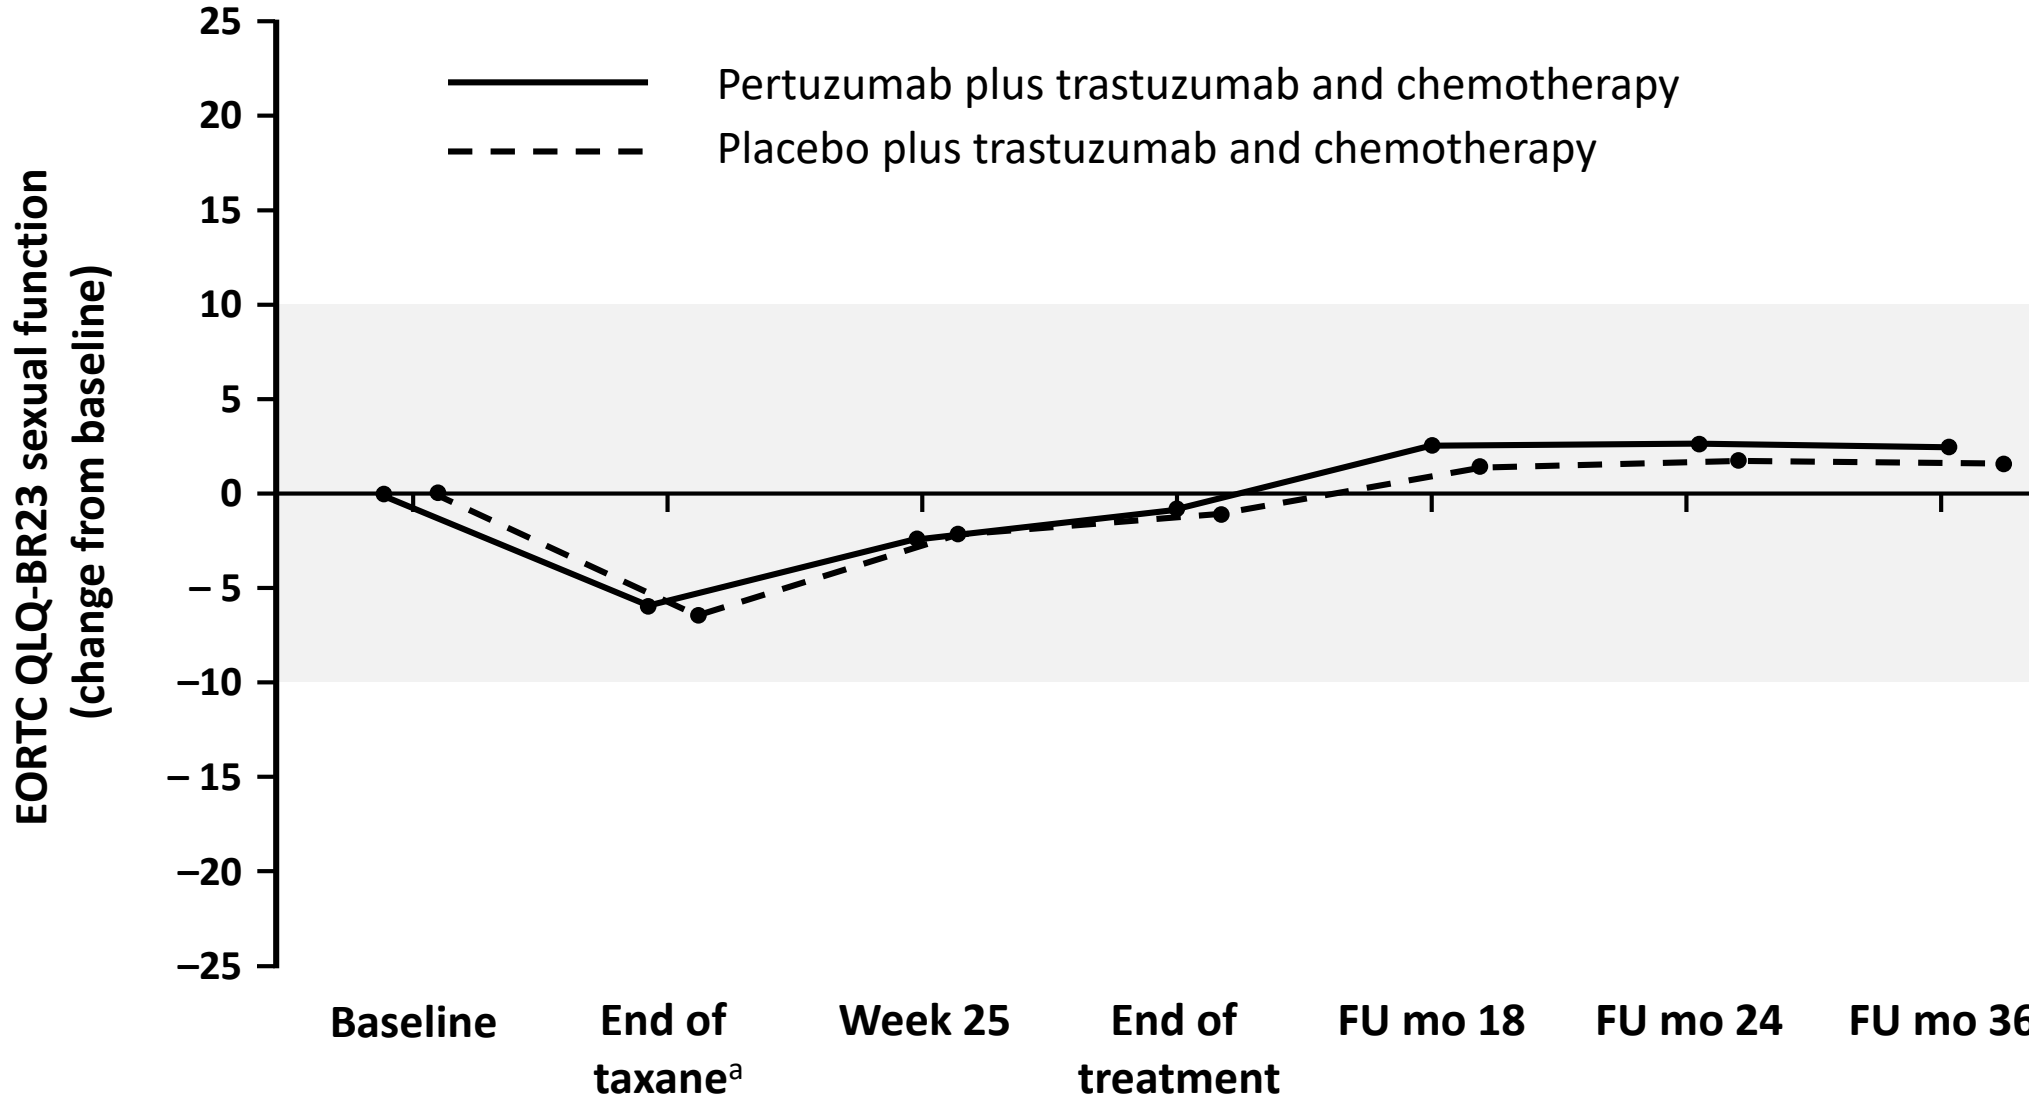

**N**

|       |             |             |             |             |             |             |             |
|-------|-------------|-------------|-------------|-------------|-------------|-------------|-------------|
| —     | <b>2258</b> | <b>1969</b> | <b>1945</b> | <b>2176</b> | <b>1814</b> | <b>1757</b> | <b>1711</b> |
| - - - | <b>2260</b> | <b>2008</b> | <b>1975</b> | <b>2191</b> | <b>1820</b> | <b>1778</b> | <b>1685</b> |

**Supplementary Fig. S4 Mean EORTC QLQ-C30 scores for the symptom scales of (A) nausea and vomiting, (B) pain, (C) constipation, (D) financial difficulties, and (E) insomnia in patients in the pertuzumab plus trastuzumab and chemotherapy arm (solid line) or the placebo plus trastuzumab and chemotherapy arm (dashed line).**

Horizontal lines indicate the level at which the change from baseline would be considered clinically meaningful.<sup>12</sup> Higher scores indicate worsening of symptoms. Numbers below graphs indicate the number of patients who completed the scale.

<sup>a</sup>For patients receiving anthracycline-based chemotherapy, the actual time point was week 10 or week 13 of HER2-targeted treatment (depending on the chemotherapy regimen given). For patients receiving non-anthracycline-based chemotherapy (i.e., the pertuzumab plus trastuzumab and docetaxel-carboplatin regimen), this was week 19 of HER2-targeted treatment

*EORTC QLQ-C30* European Organisation for Research and Treatment of Cancer Quality of Life Questionnaire, Core module, version 3, *FU* follow-up, *mo* months

**A**

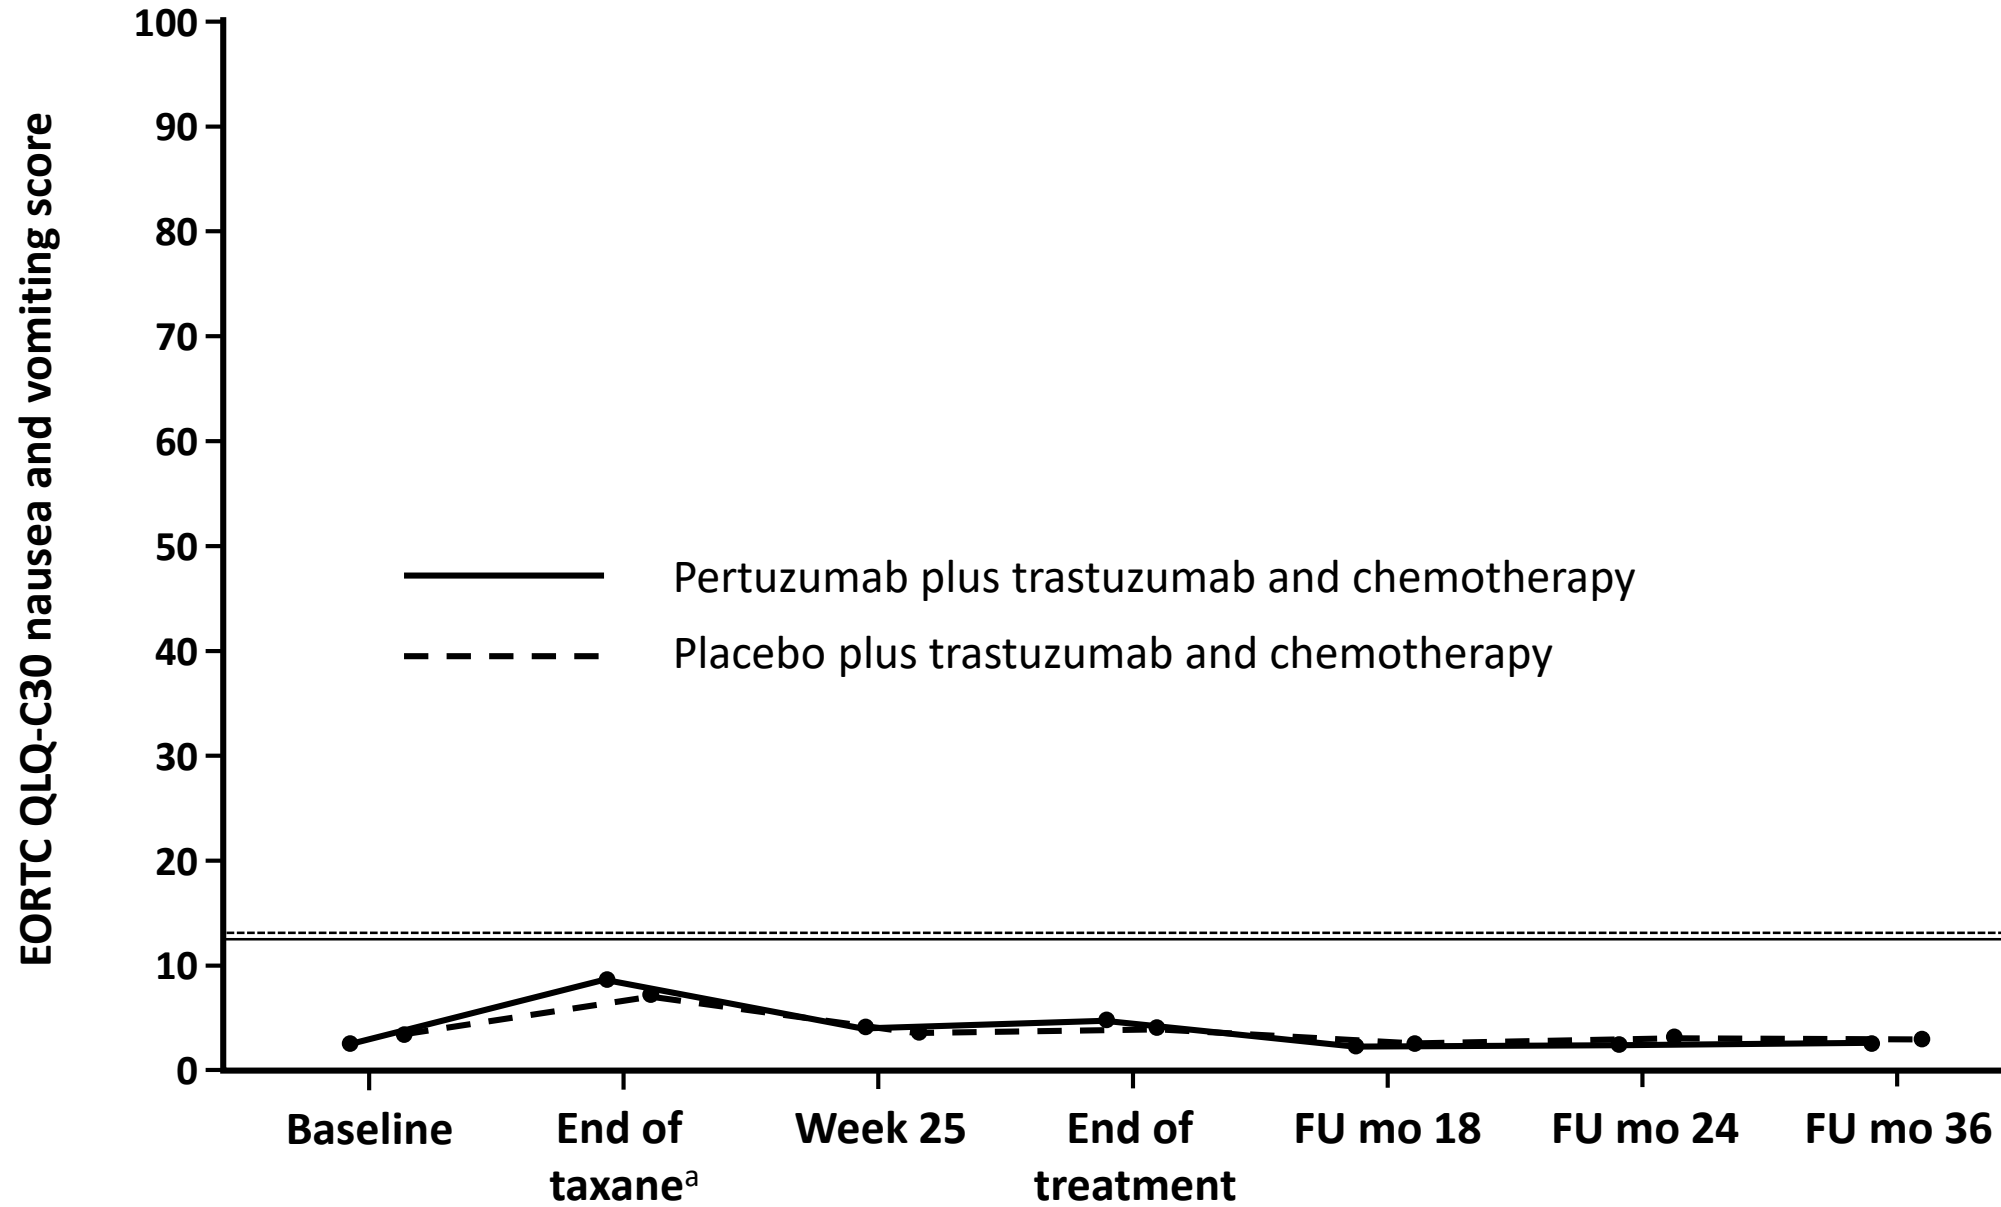

**N**

|       |             |             |             |             |             |             |             |
|-------|-------------|-------------|-------------|-------------|-------------|-------------|-------------|
| —     | <b>2338</b> | <b>2118</b> | <b>2096</b> | <b>2312</b> | <b>1960</b> | <b>1895</b> | <b>1858</b> |
| - - - | <b>2342</b> | <b>2164</b> | <b>2123</b> | <b>2340</b> | <b>1958</b> | <b>1908</b> | <b>1829</b> |

**B**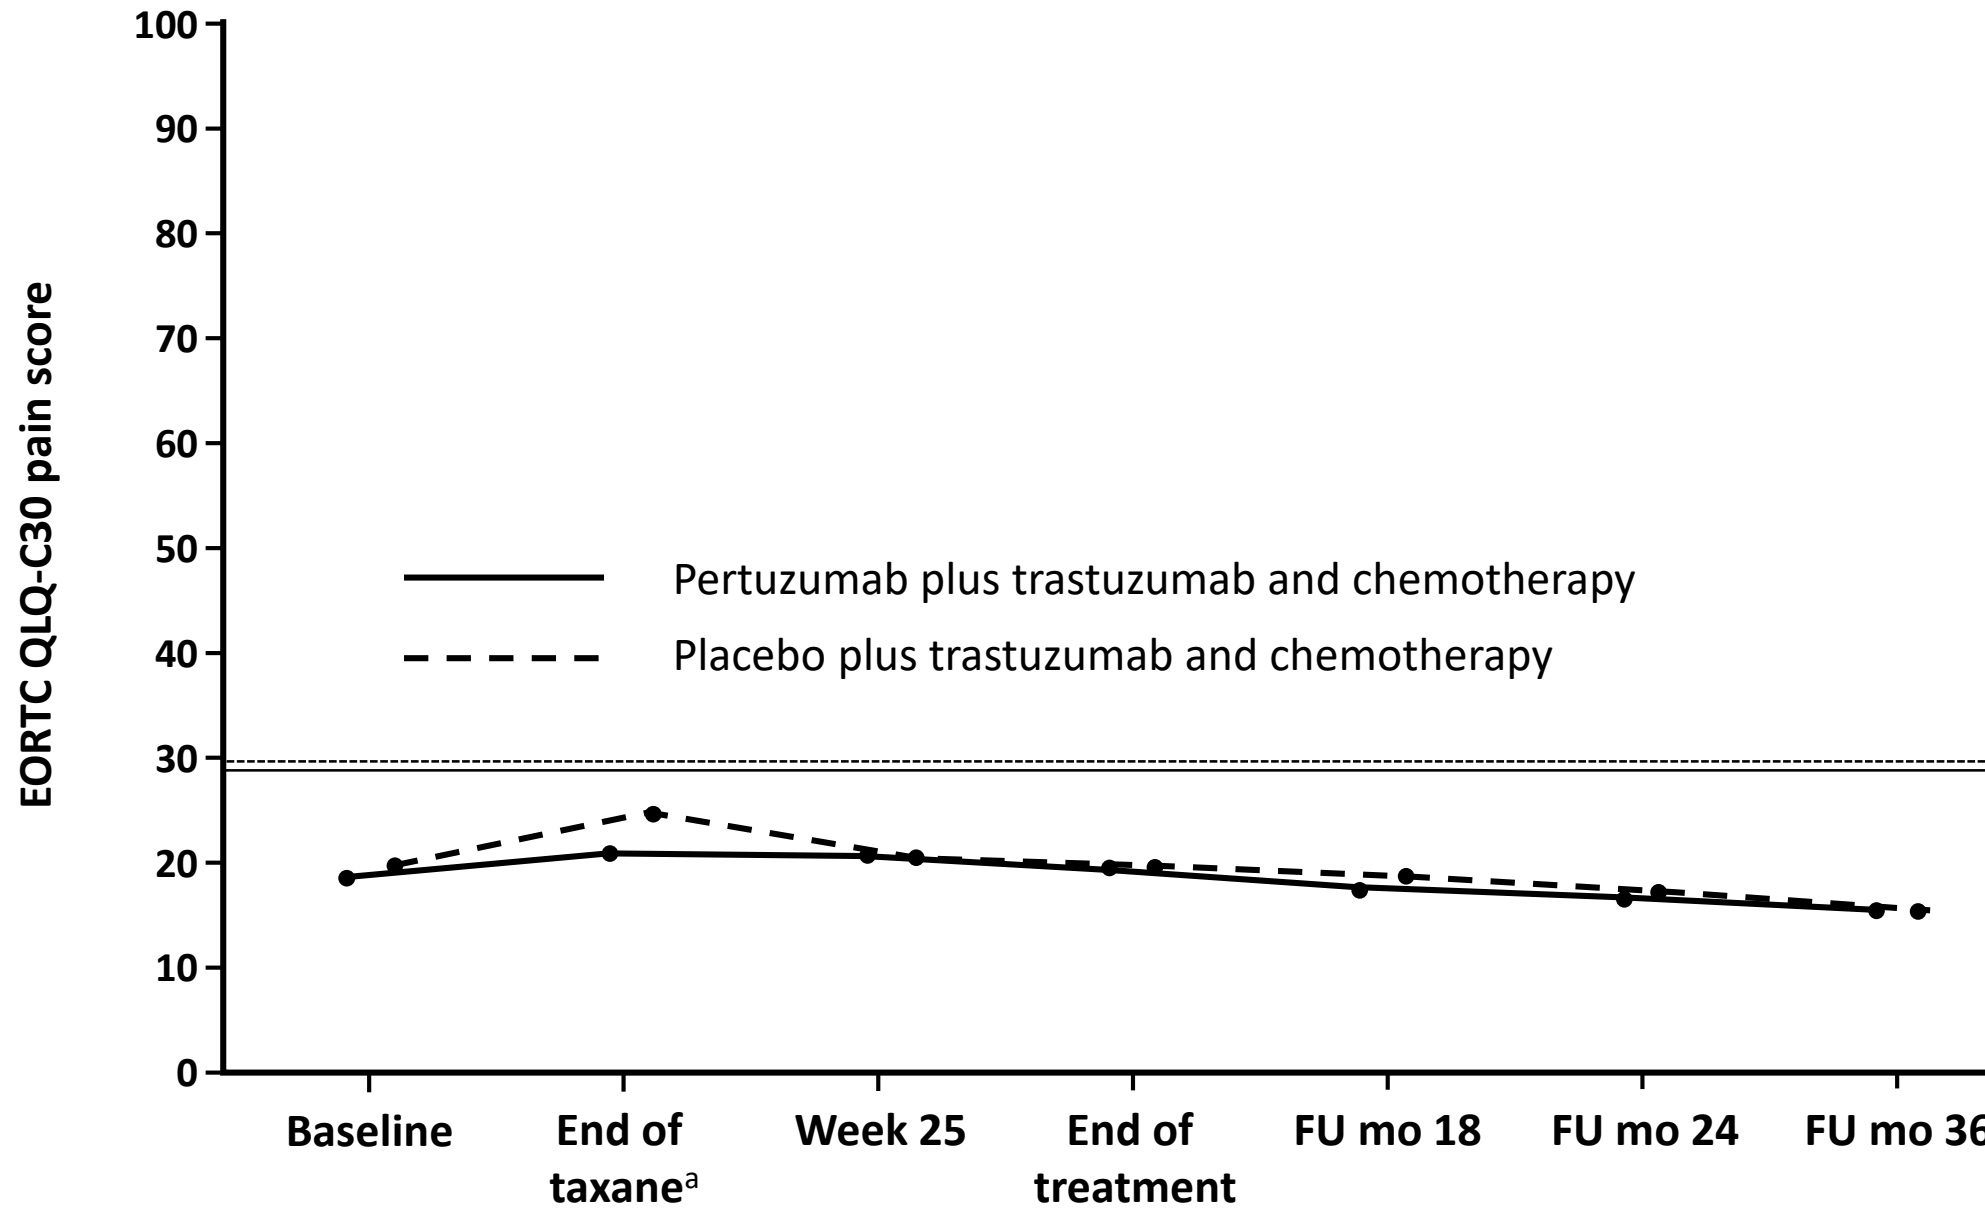

N

|       |             |             |             |             |             |             |             |
|-------|-------------|-------------|-------------|-------------|-------------|-------------|-------------|
| —     | <b>2337</b> | <b>2119</b> | <b>2096</b> | <b>2313</b> | <b>1960</b> | <b>1899</b> | <b>1858</b> |
| - - - | <b>2342</b> | <b>2164</b> | <b>2124</b> | <b>2340</b> | <b>1960</b> | <b>1908</b> | <b>1830</b> |

**C**

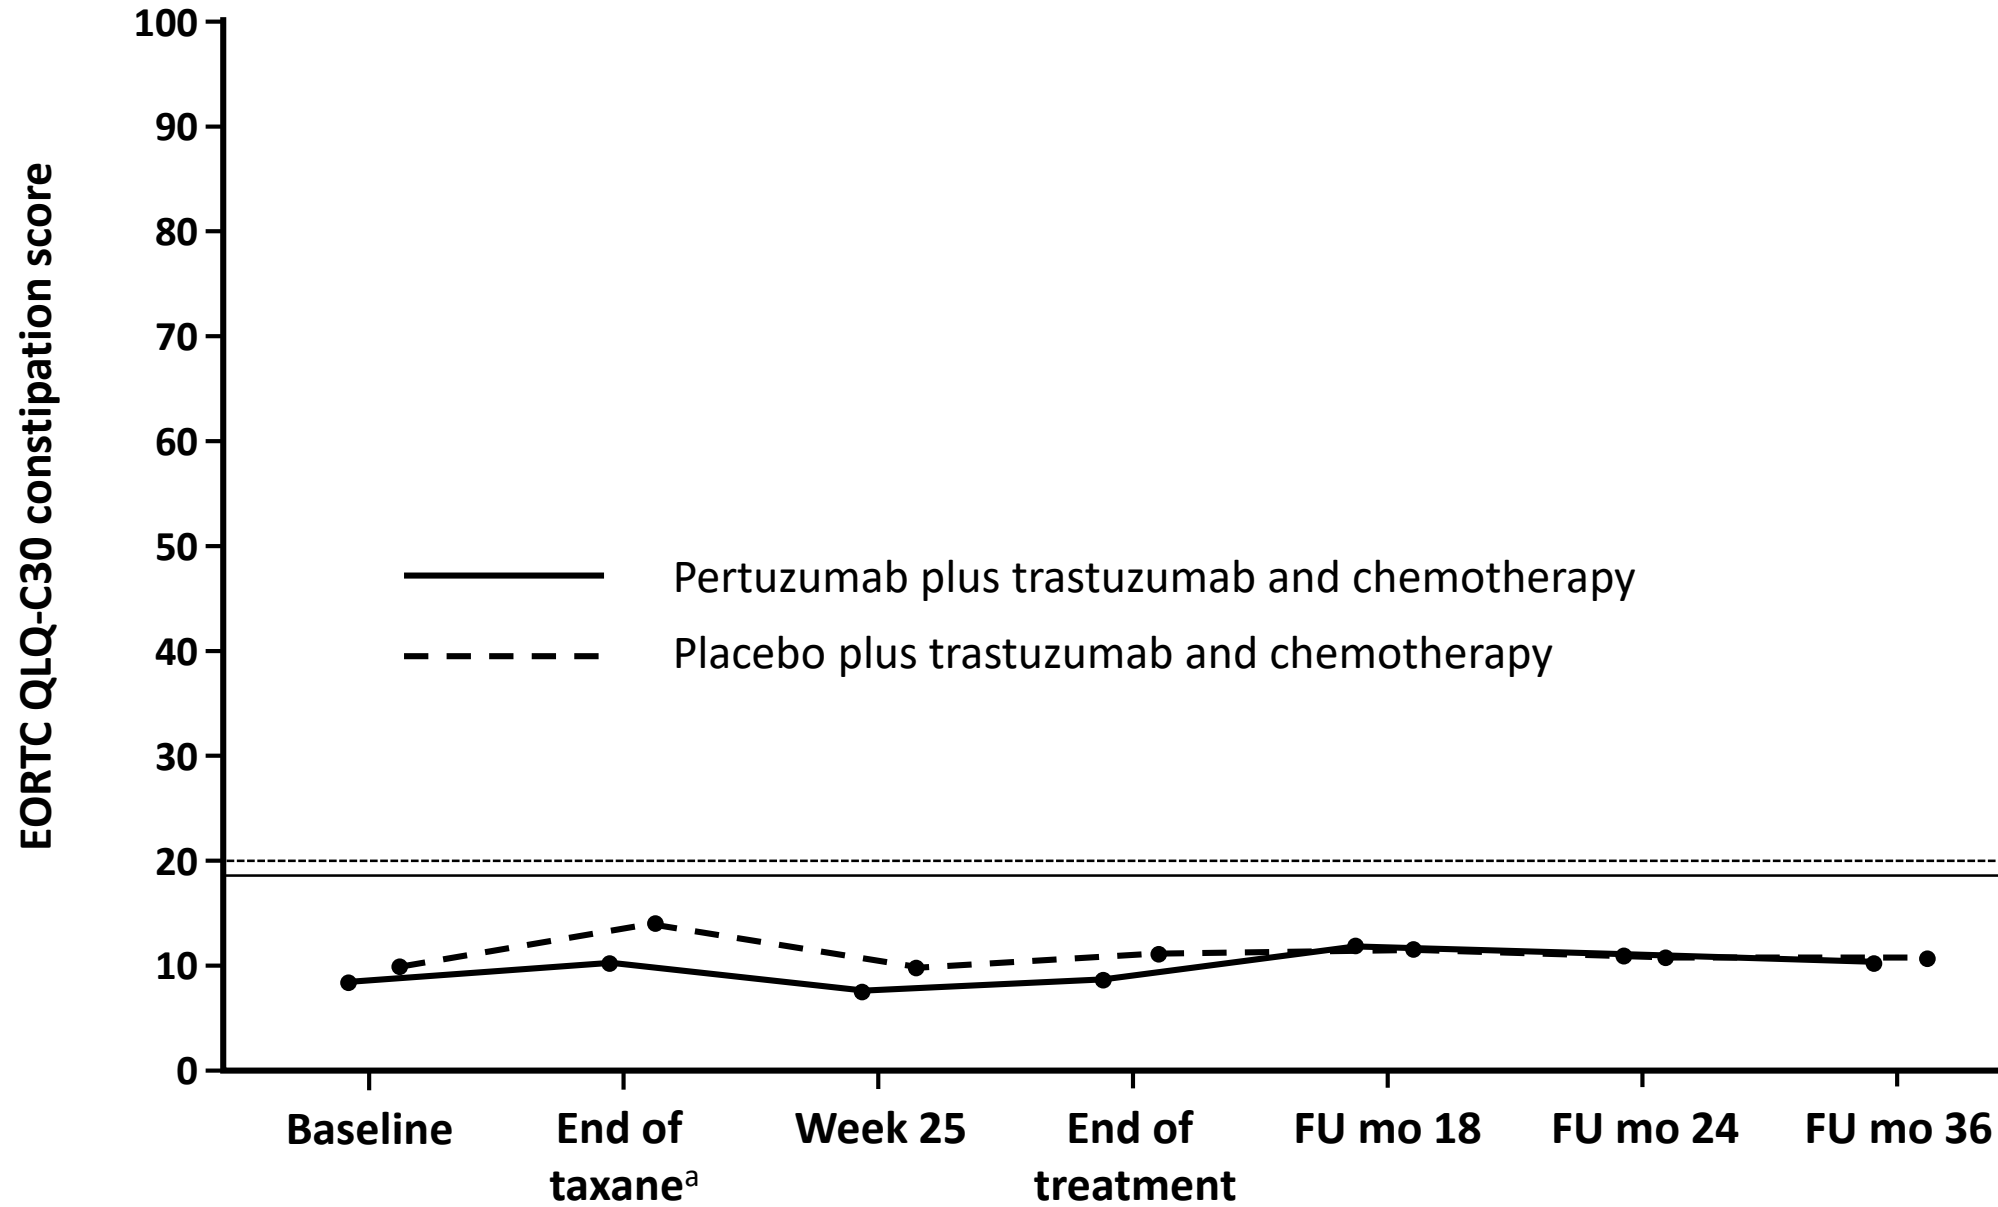

**N**

|       |             |             |             |             |             |             |             |
|-------|-------------|-------------|-------------|-------------|-------------|-------------|-------------|
| —     | <b>2335</b> | <b>2110</b> | <b>2093</b> | <b>2310</b> | <b>1957</b> | <b>1898</b> | <b>1857</b> |
| - - - | <b>2339</b> | <b>2161</b> | <b>2122</b> | <b>2340</b> | <b>1957</b> | <b>1907</b> | <b>1822</b> |

**D**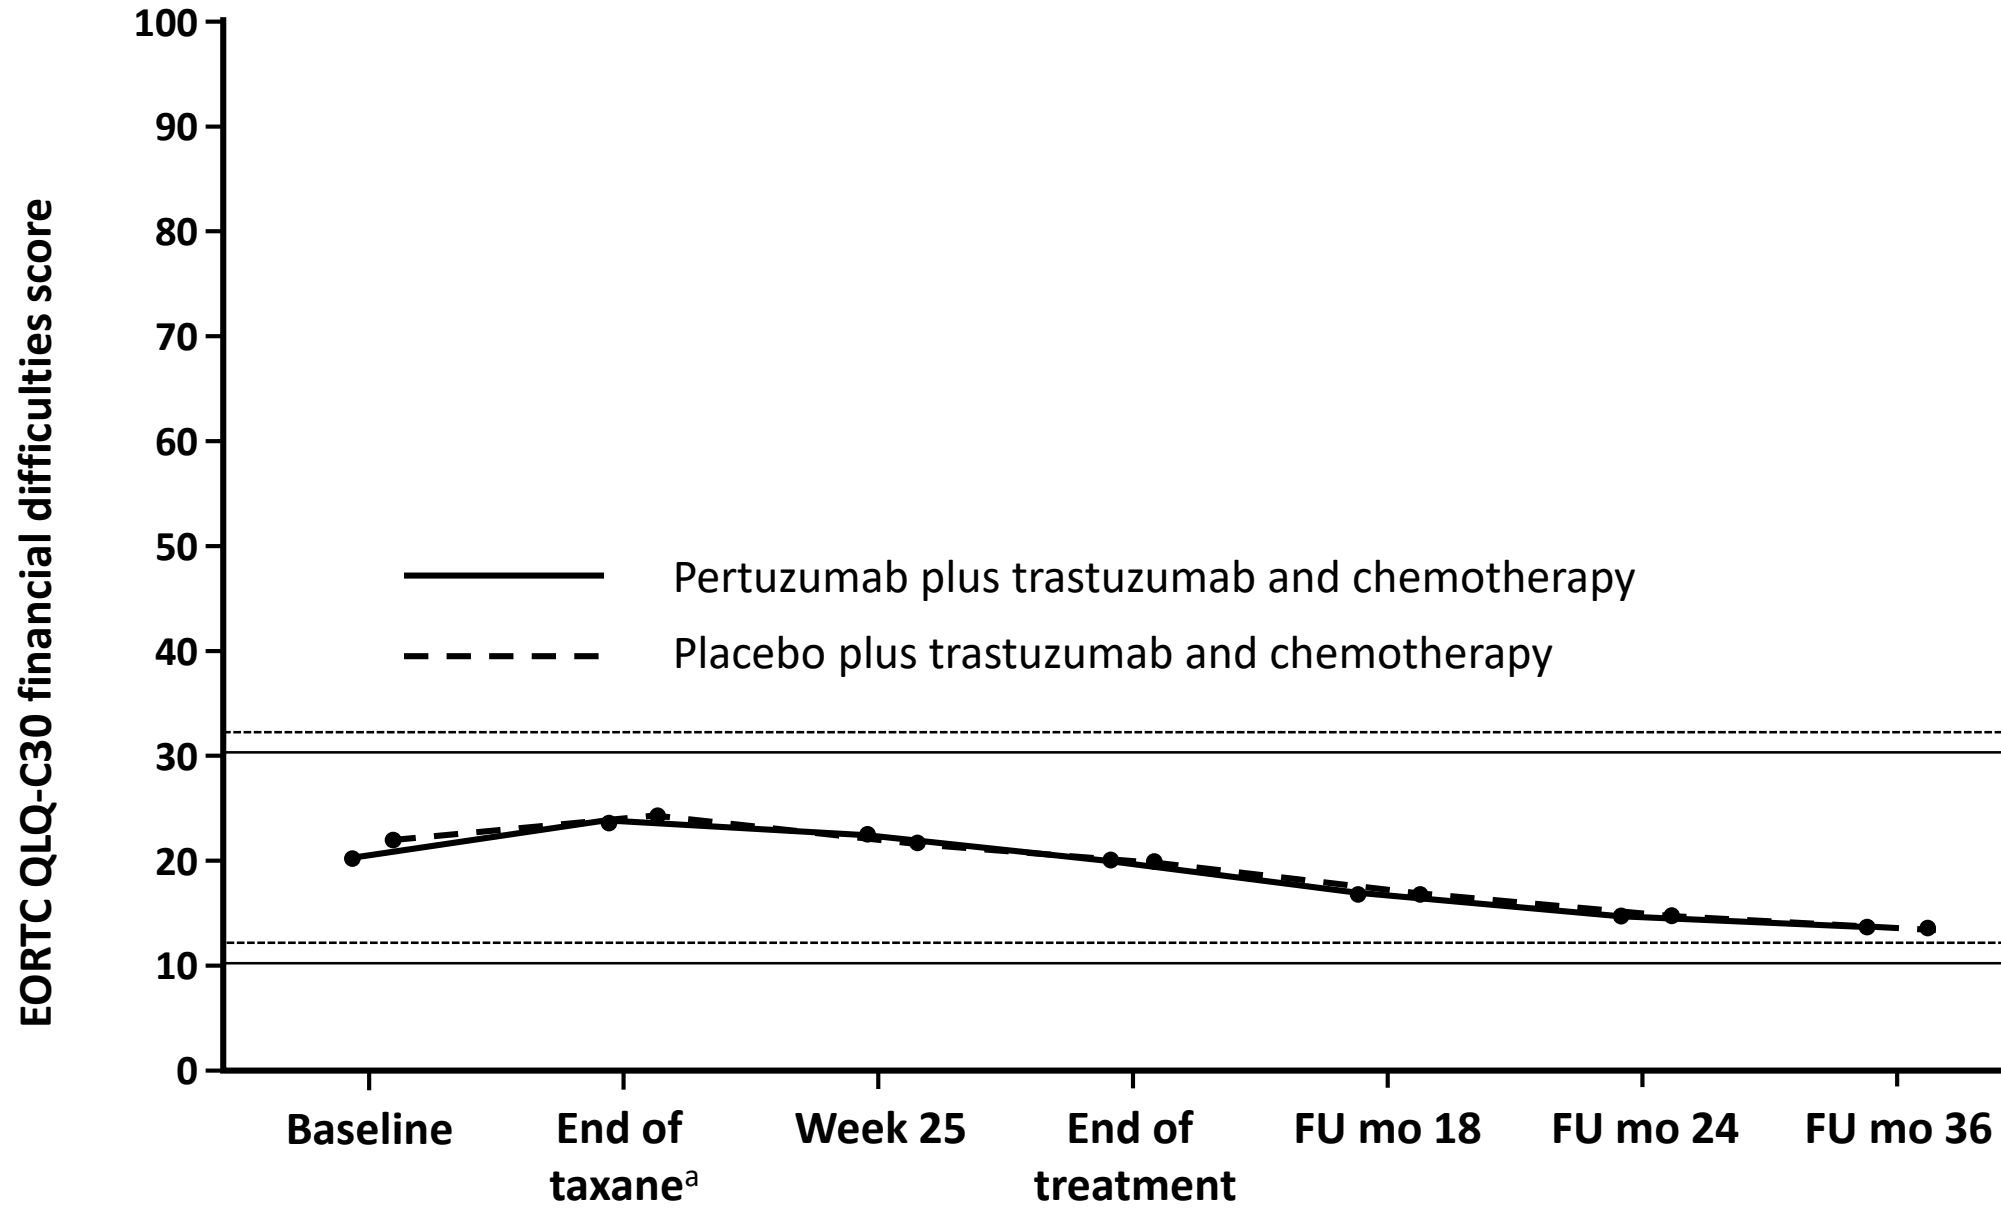**N**

|       |             |             |             |             |             |             |             |
|-------|-------------|-------------|-------------|-------------|-------------|-------------|-------------|
| —     | <b>2319</b> | <b>2108</b> | <b>2085</b> | <b>2312</b> | <b>1951</b> | <b>1896</b> | <b>1851</b> |
| - - - | <b>2334</b> | <b>2155</b> | <b>2119</b> | <b>2340</b> | <b>1952</b> | <b>1904</b> | <b>1823</b> |



**E**

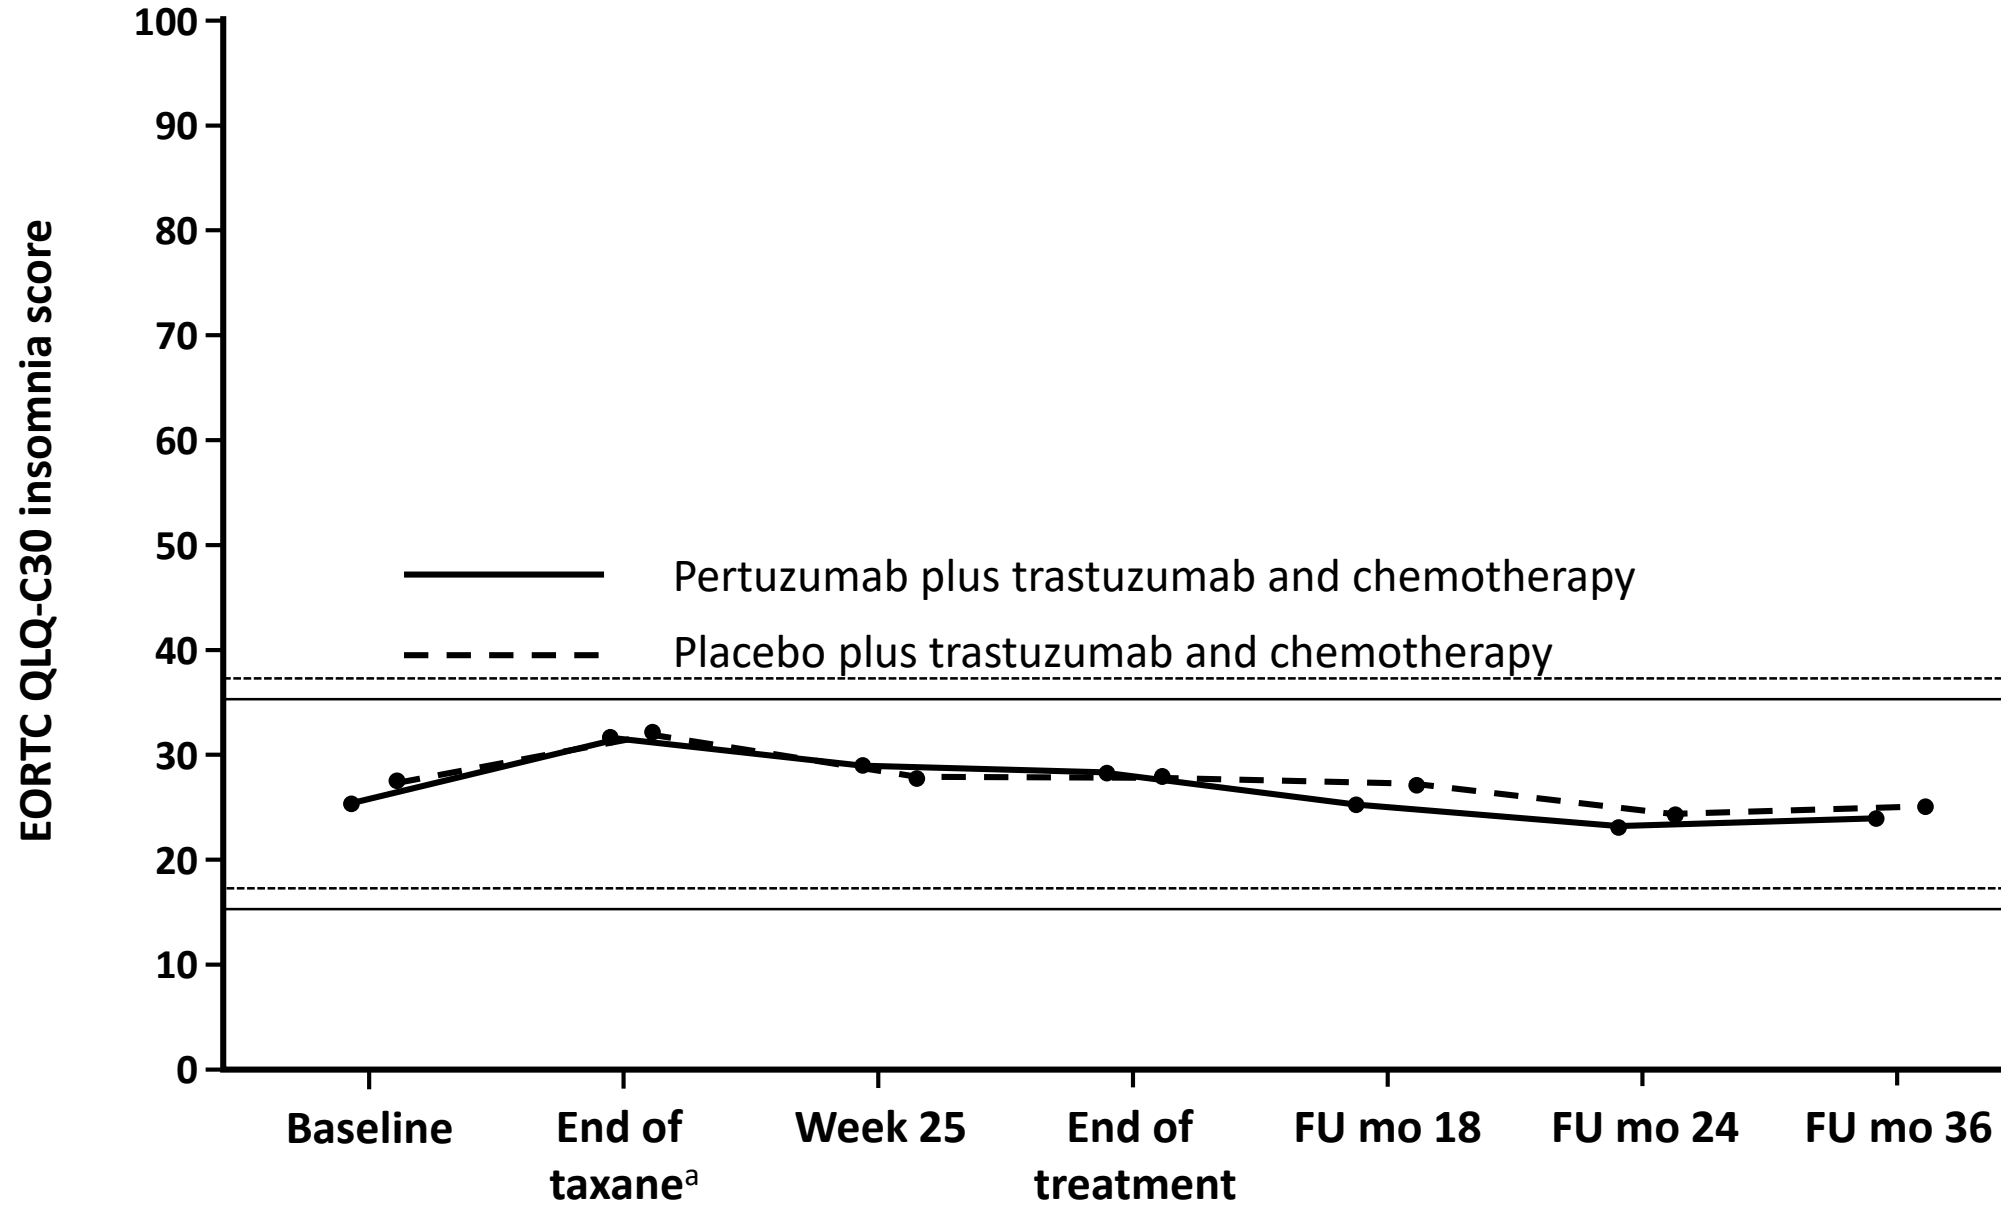

**N**

|       |             |             |             |             |             |             |             |
|-------|-------------|-------------|-------------|-------------|-------------|-------------|-------------|
| —     | <b>2333</b> | <b>2118</b> | <b>2095</b> | <b>2311</b> | <b>1958</b> | <b>1895</b> | <b>1857</b> |
| - - - | <b>2338</b> | <b>2160</b> | <b>2121</b> | <b>2338</b> | <b>1953</b> | <b>1907</b> | <b>1827</b> |

**Supplementary Fig. S5 Mean EORTC QLQ-C30 (A) global health status and functioning scores ([B] physical, [C] role, [D] emotional, [E] cognitive and [F] social) by arm and chemotherapy type (anthracycline or non-anthracycline).** Horizontal lines indicate the level at which the change from baseline was considered clinically meaningful,<sup>12</sup> with asterisks indicating time points where there was a clinically meaningful change. Higher scores indicate better functioning or health status.

<sup>a</sup>Anthracycline-treated patients only

<sup>b</sup>For patients receiving anthracycline-based chemotherapy, the actual time point was week 10 or week 13 of HER2-targeted treatment (depending on the chemotherapy regimen given). For patients receiving non-anthracycline-based chemotherapy (i.e., the pertuzumab plus trastuzumab and docetaxel-carboplatin regimen), this was week 19 of HER2-targeted treatment

*EORTC QLQ-C30* European Organisation for Research and Treatment of Cancer Quality of Life Questionnaire, Core module, version 3, *FU* follow-up, *mo* months

**A**

Figure S5A

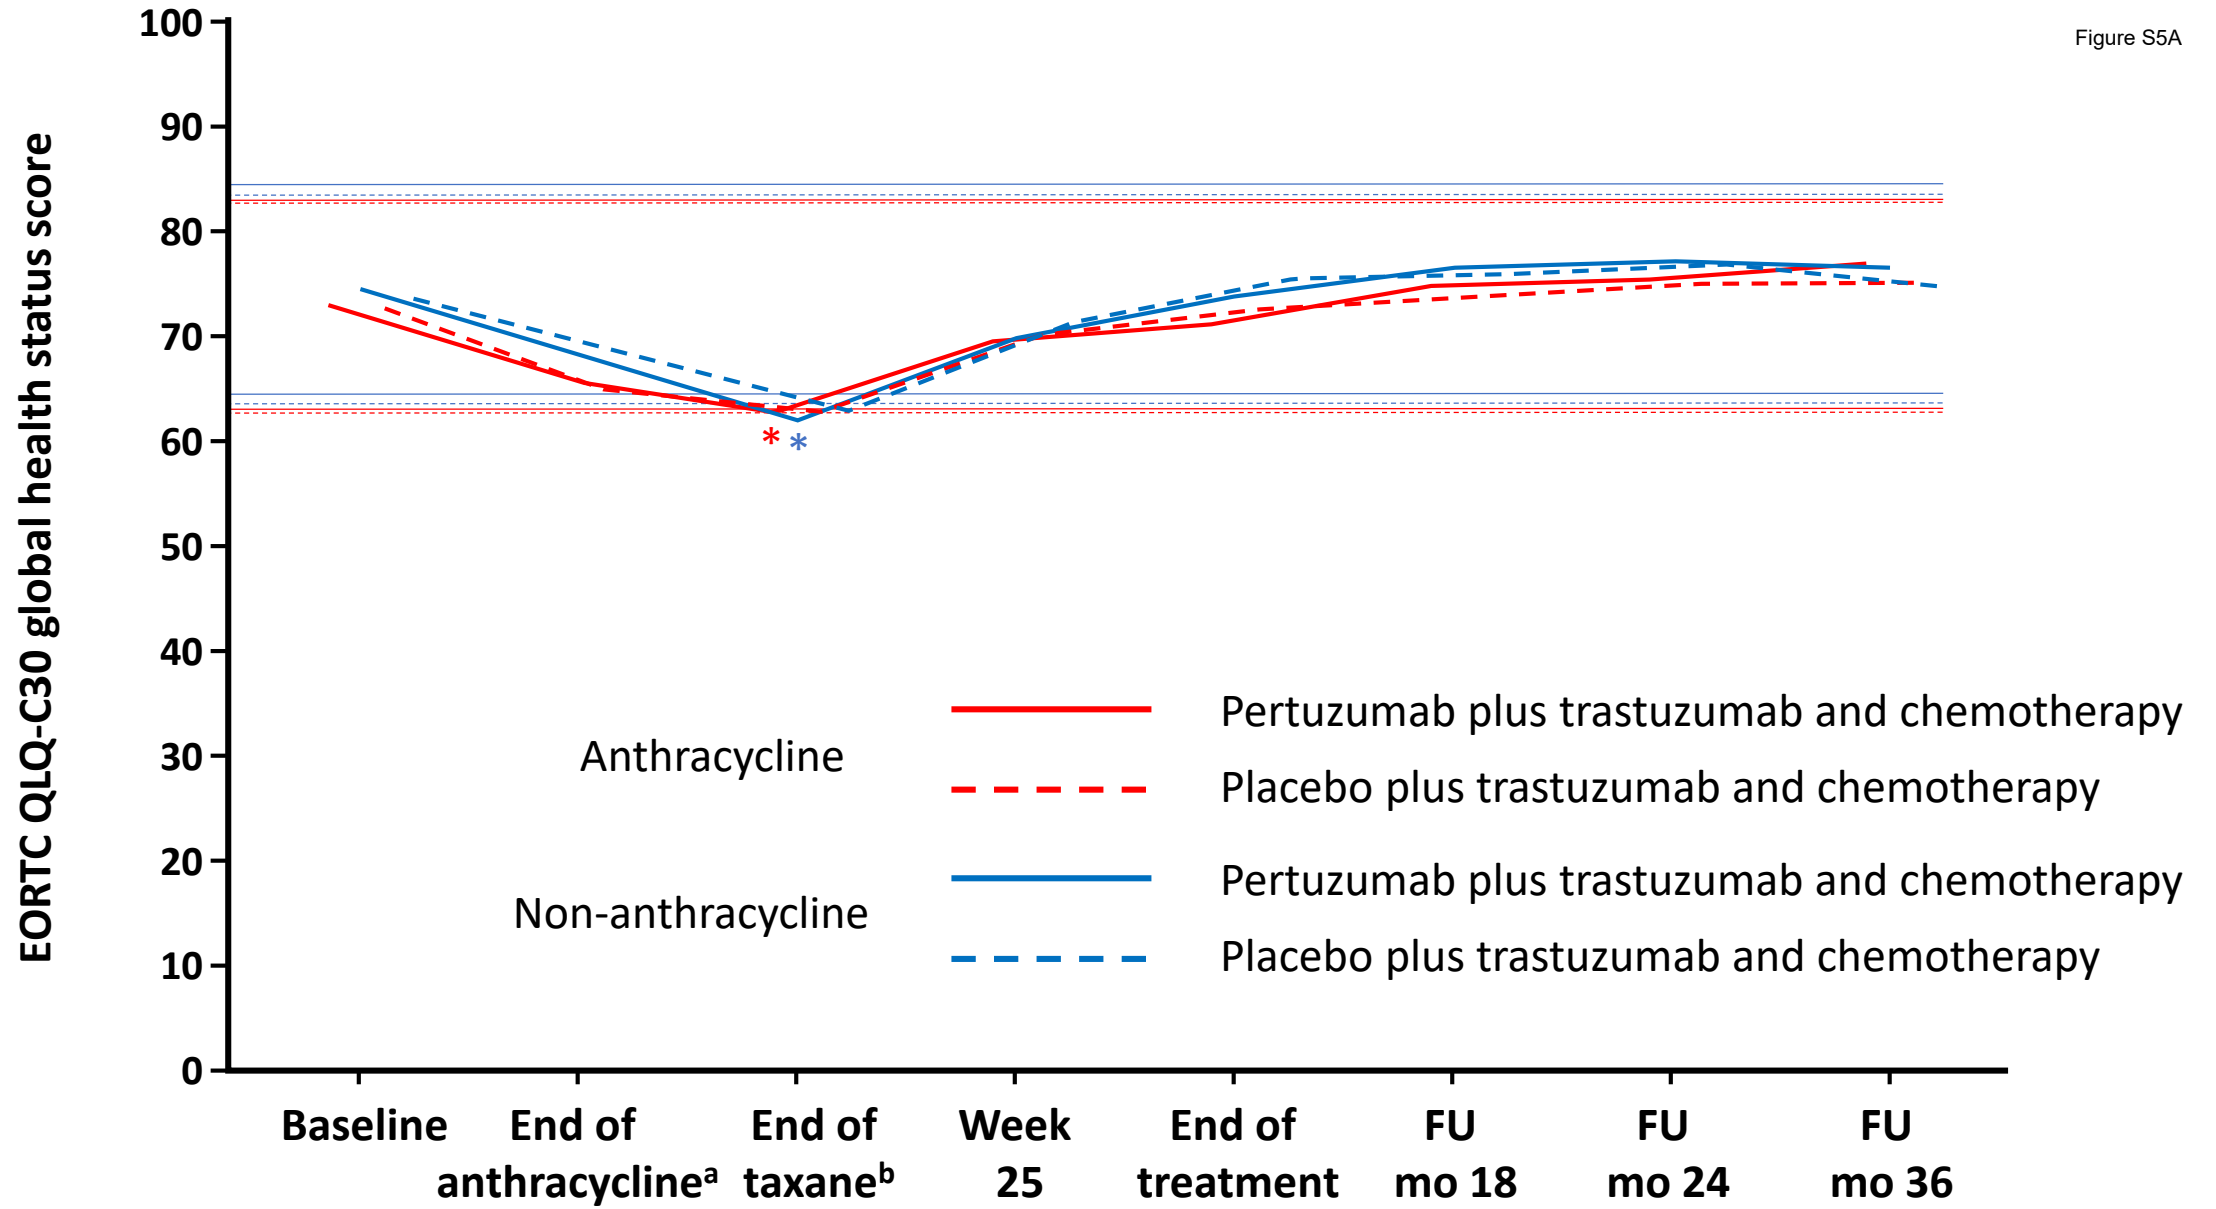

**B**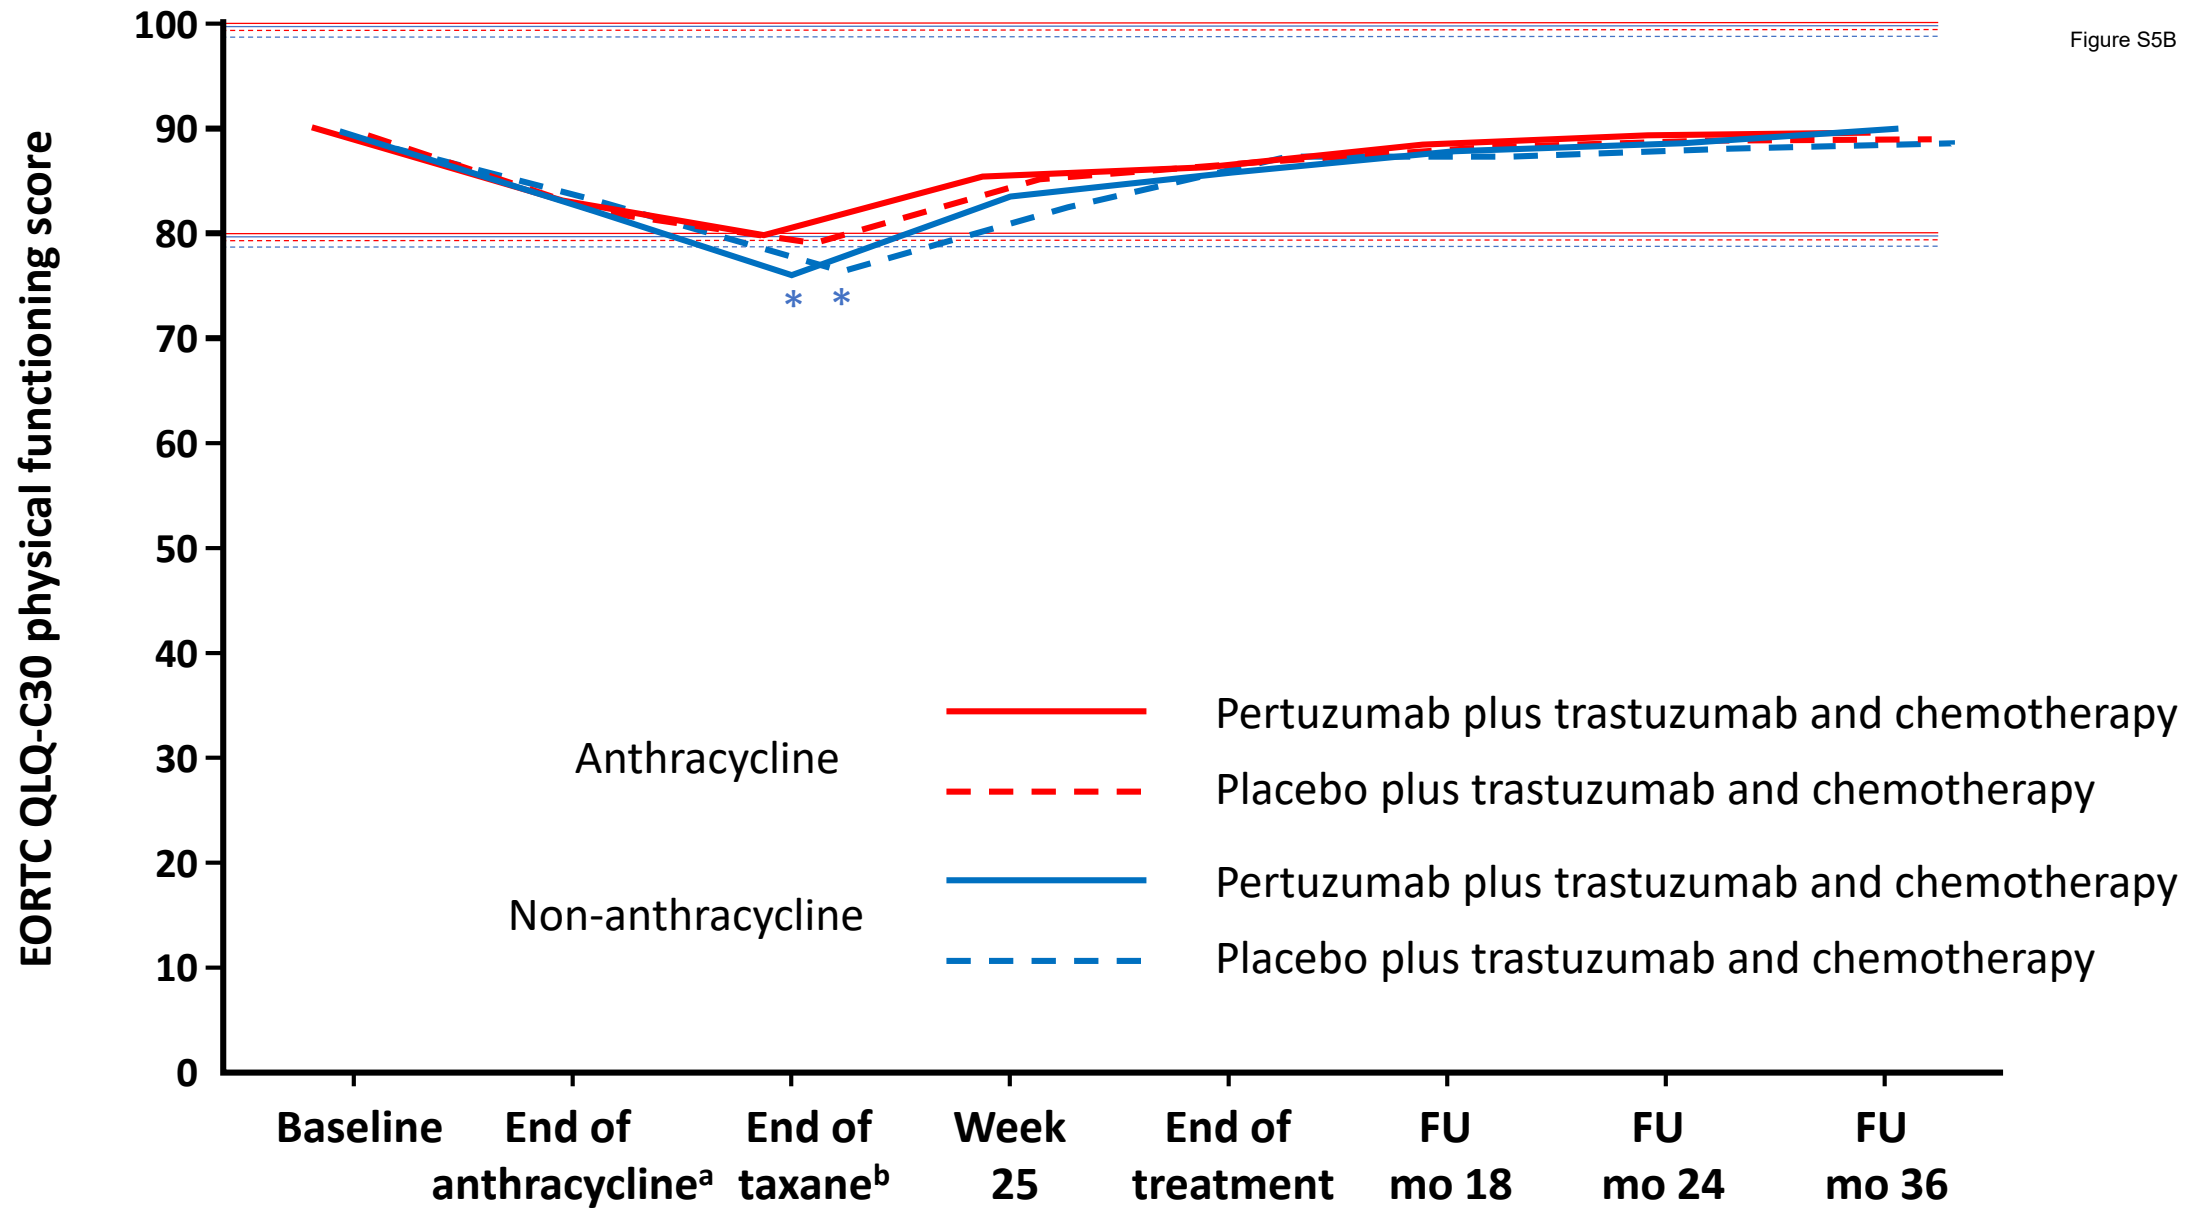

C

Figure S5C

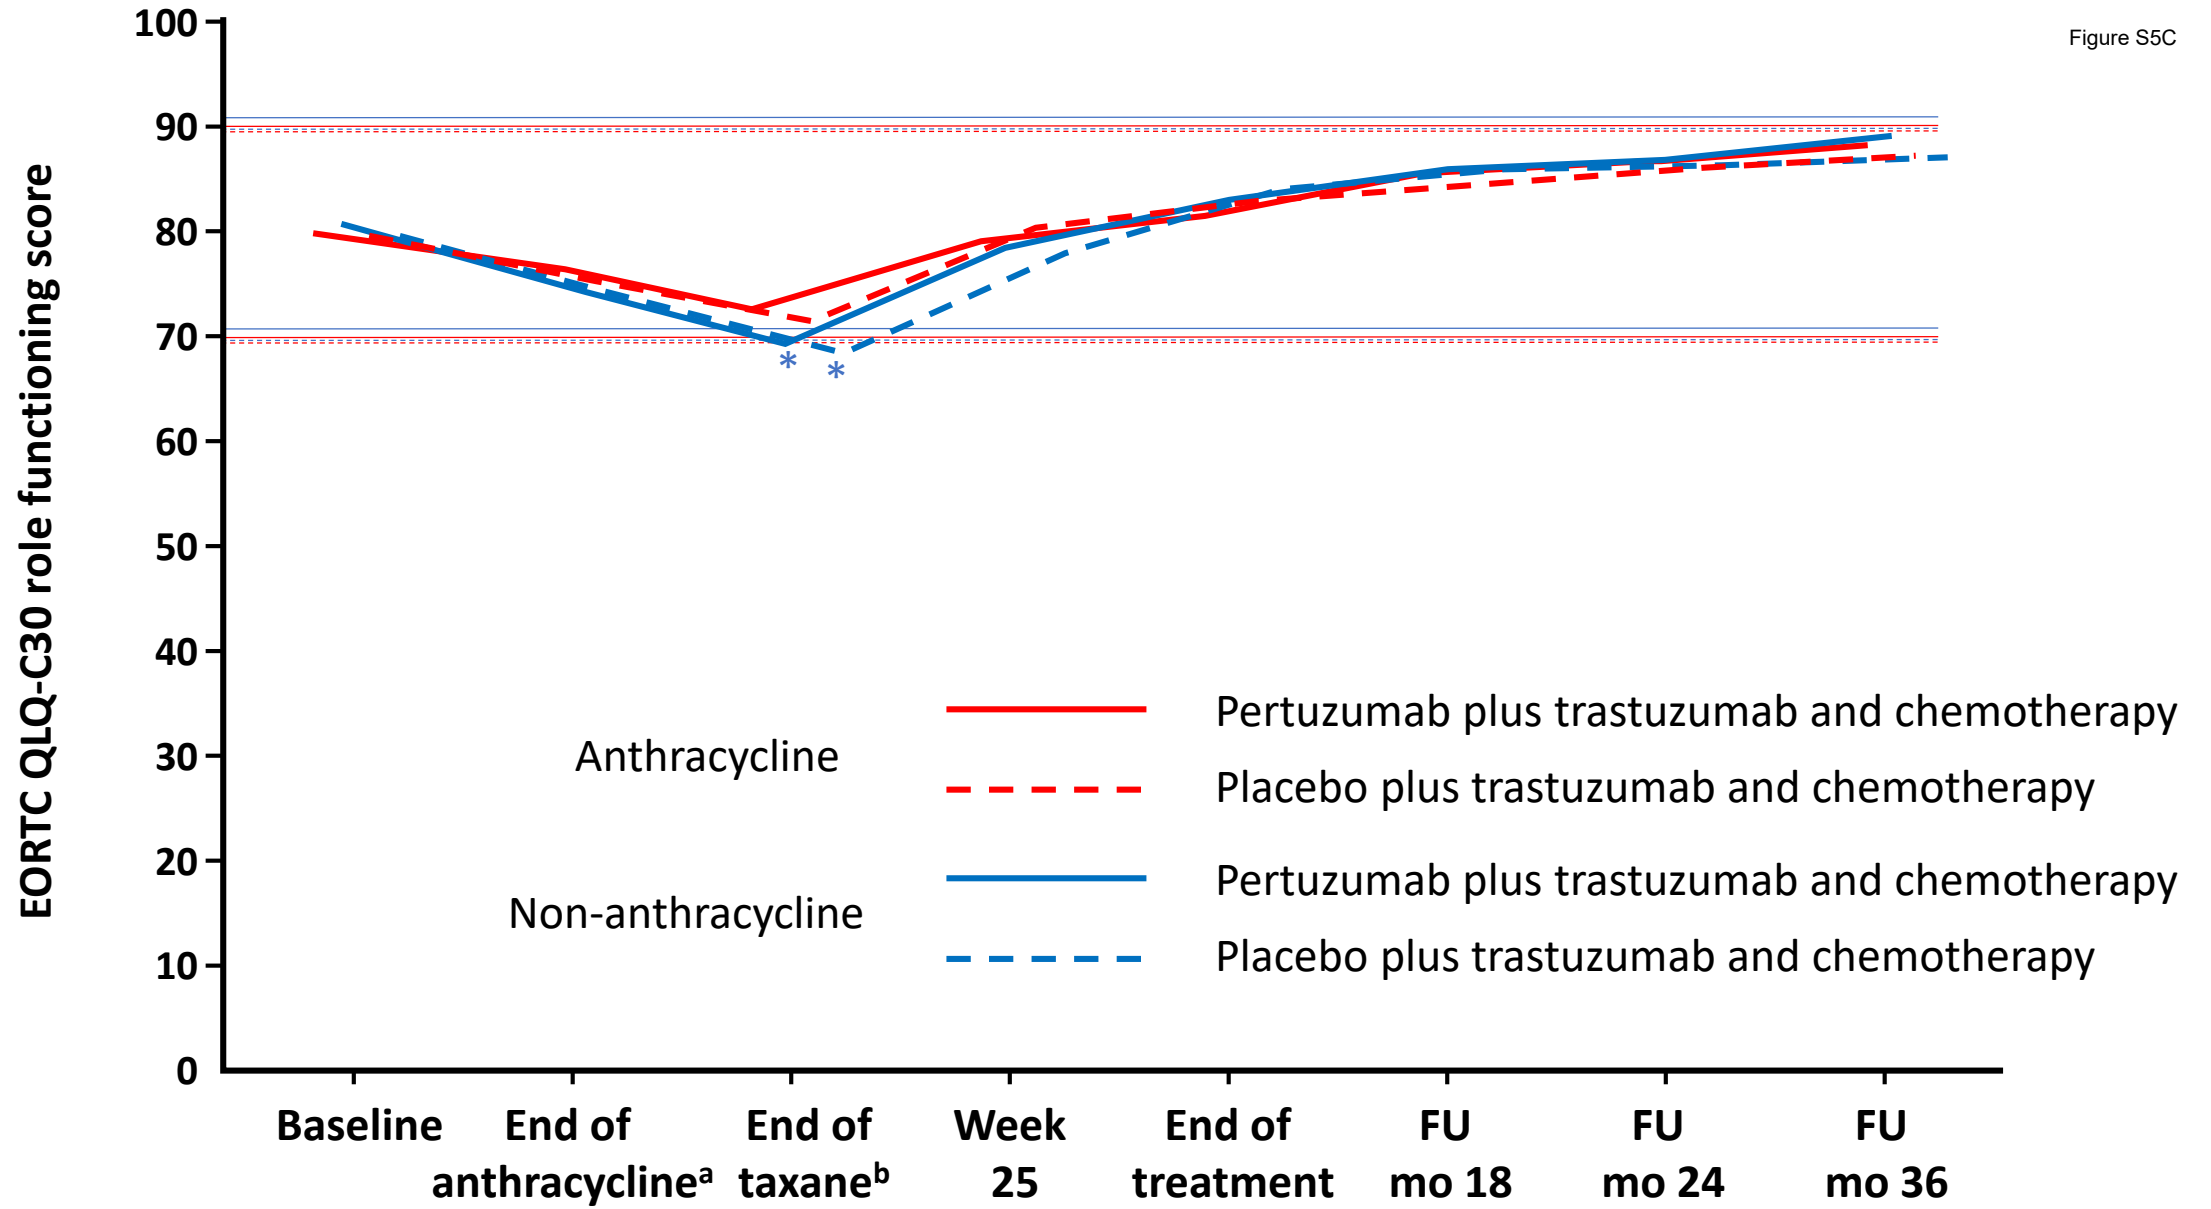

D

Figure S5D

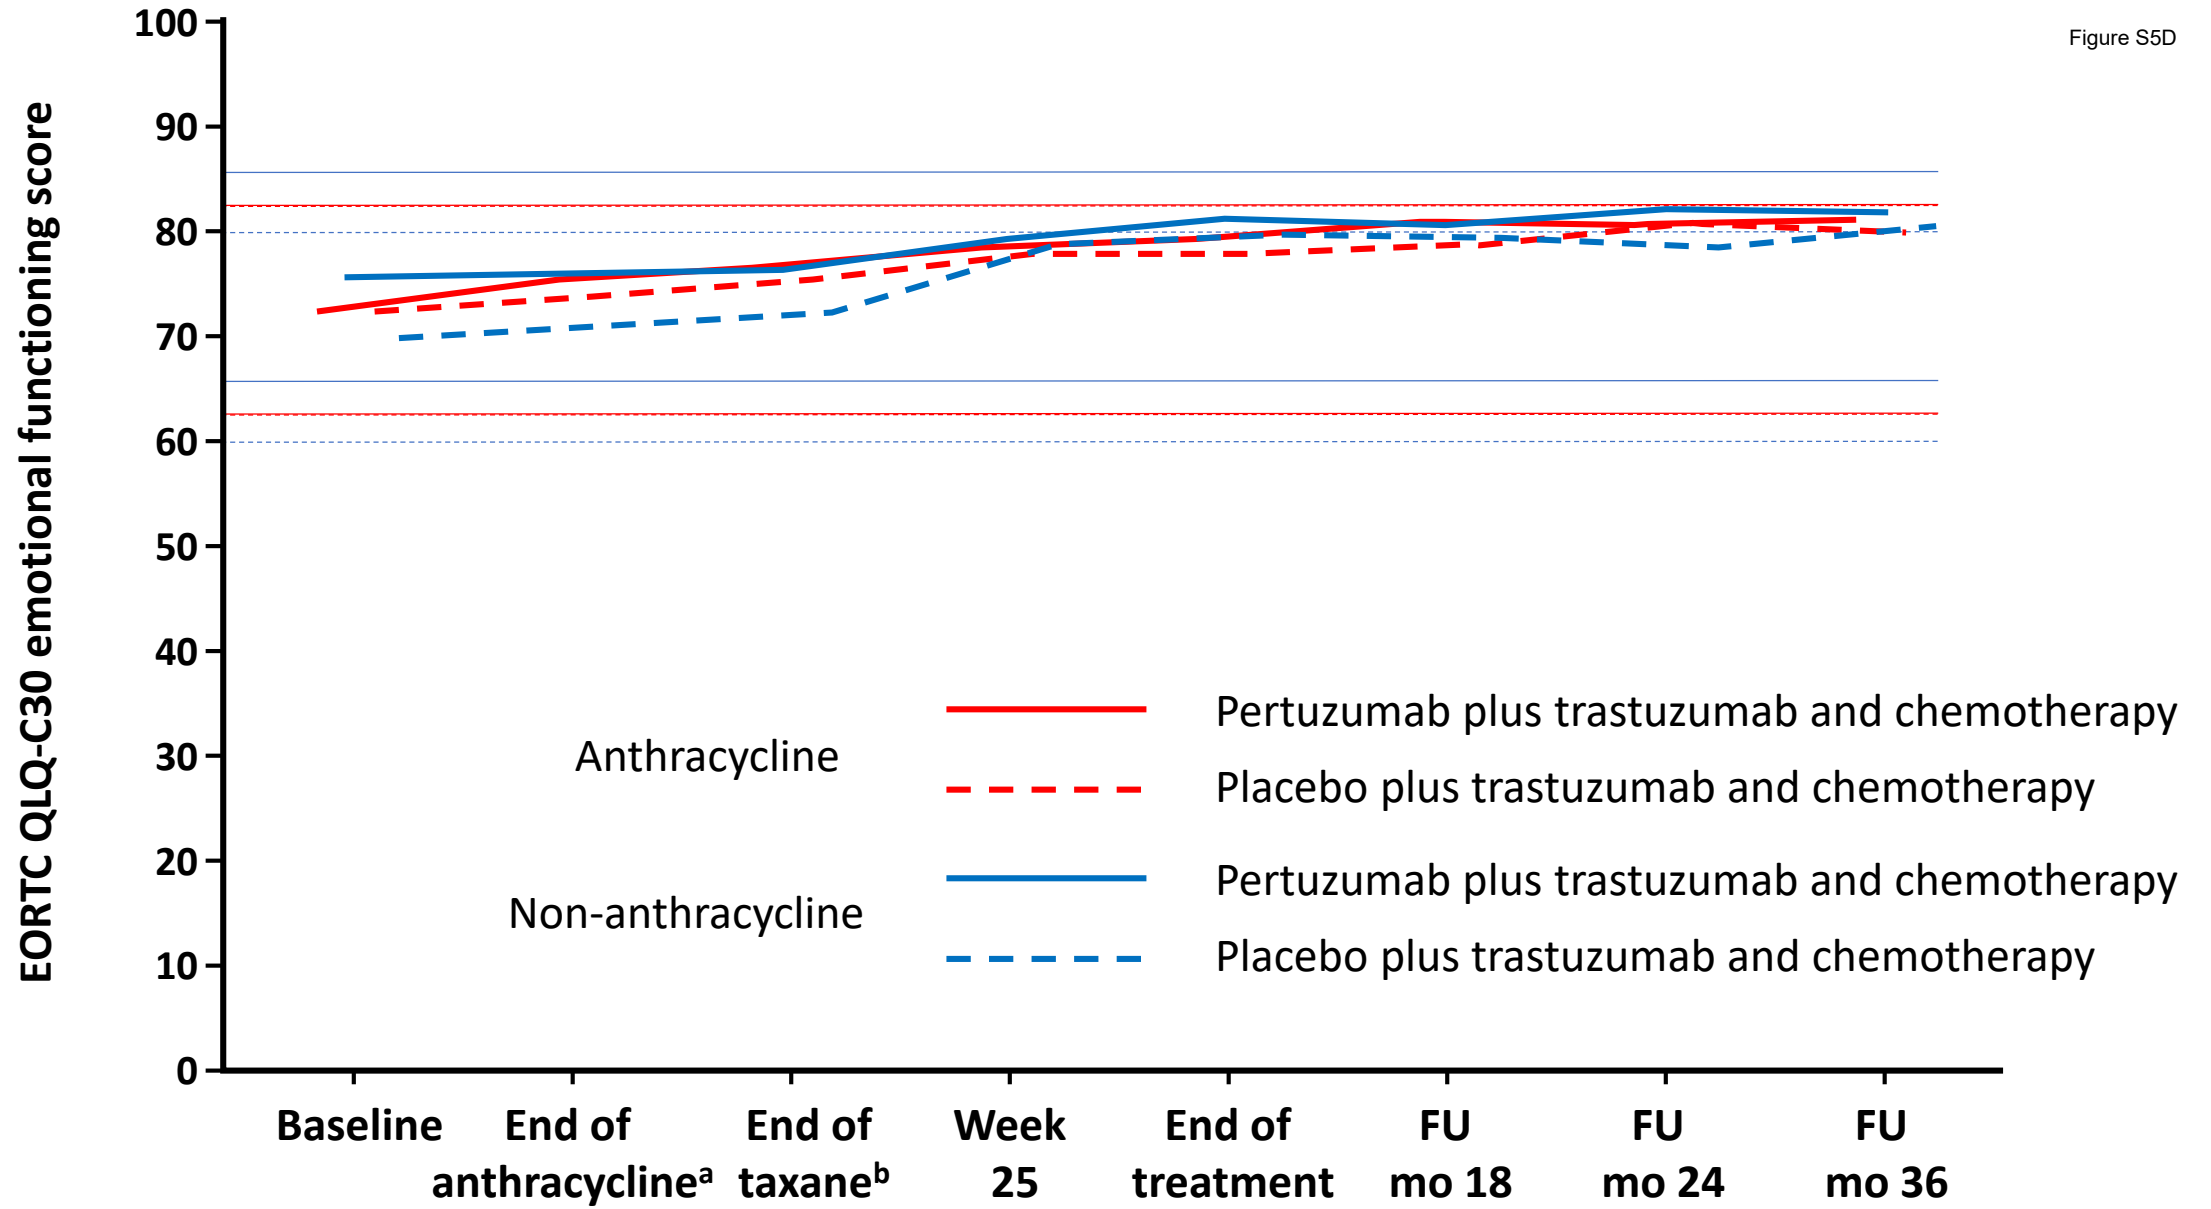

**E**

Figure S5E

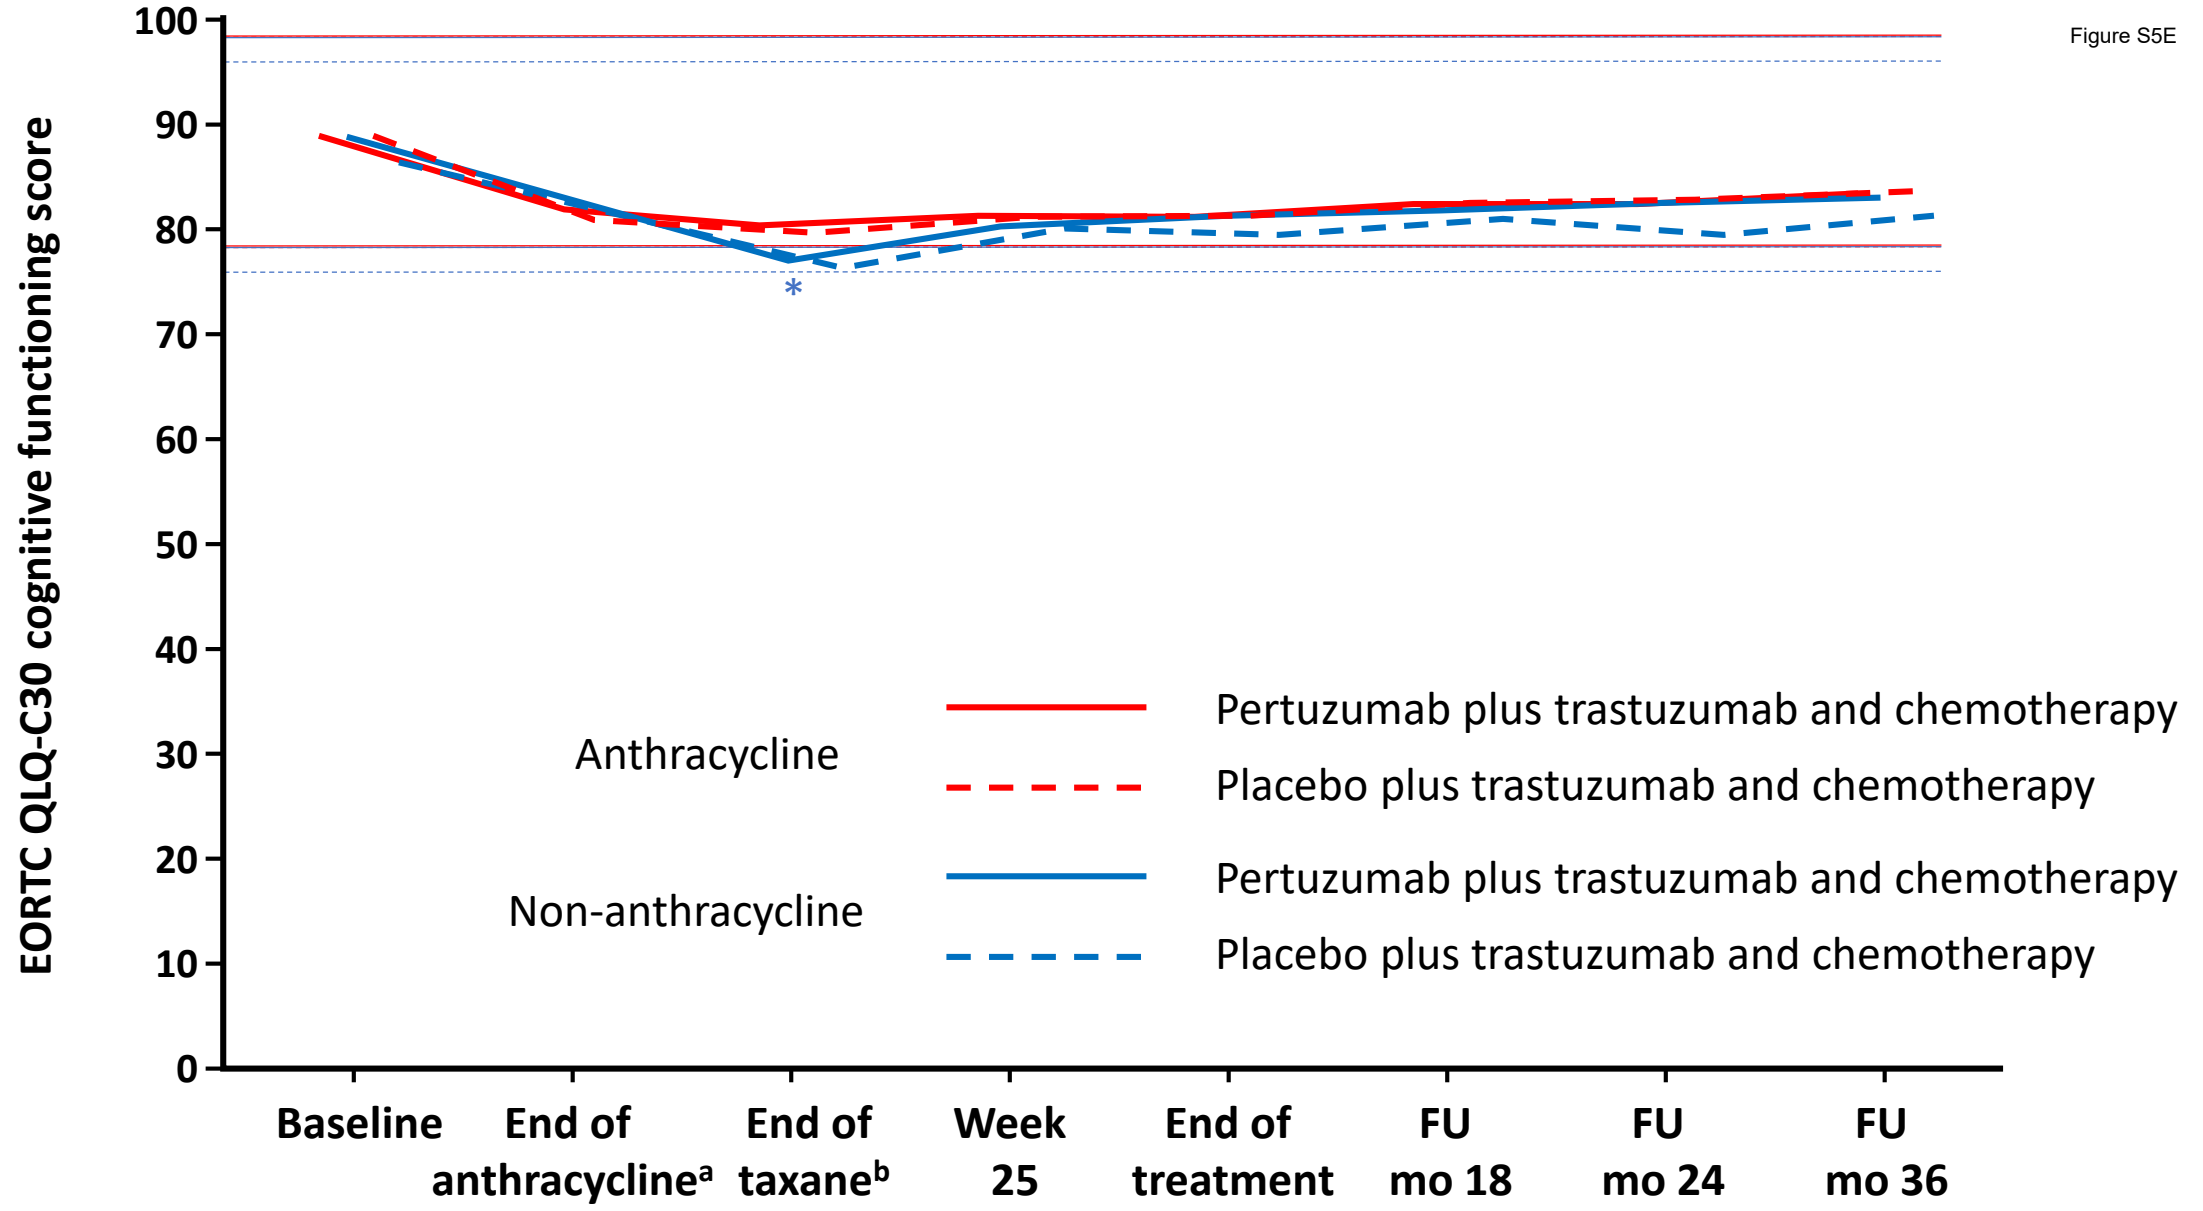

**F**

Figure S5F

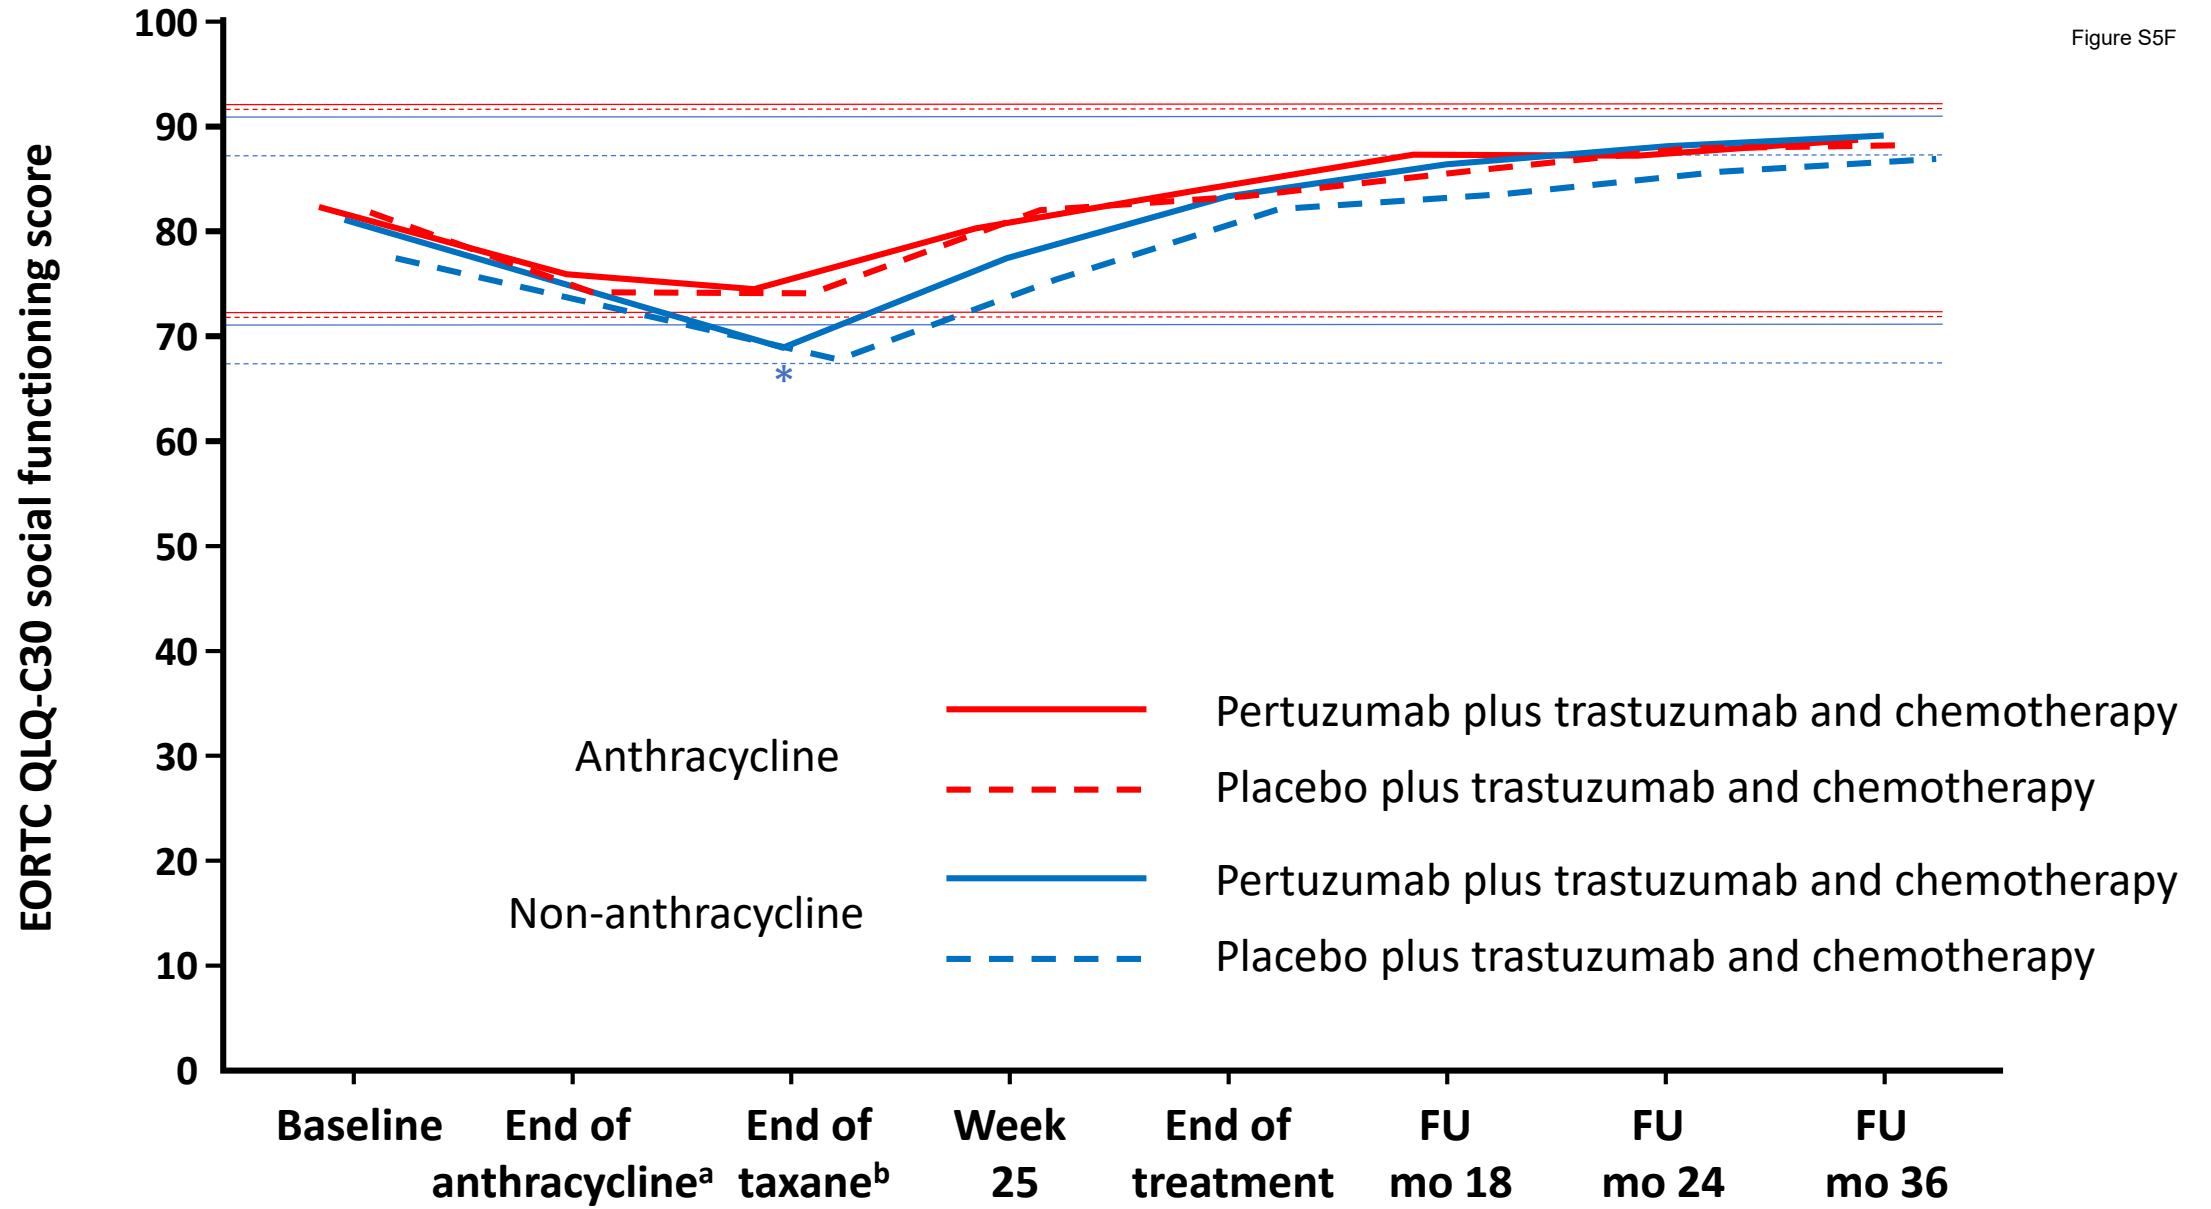



**Supplementary Table S1.** EORTC QLQ-C-30 global health status scores (absolute values and changes from baseline) at each visit.

| Visit                            | Pertuzumab + trastuzumab +<br>chemotherapy |                         | Placebo + trastuzumab +<br>chemotherapy |                         |
|----------------------------------|--------------------------------------------|-------------------------|-----------------------------------------|-------------------------|
|                                  | Value                                      | Change from<br>baseline | Value                                   | Change from<br>baseline |
| <b>Baseline</b>                  |                                            |                         |                                         |                         |
| <i>n</i>                         | 2329                                       |                         | 2338                                    |                         |
| Mean (SD)                        | 72.9 (19.7)                                |                         | 72.5 (19.7)                             |                         |
| Median                           | 75.0                                       |                         | 75.0                                    |                         |
| IQR                              | (58 to 83)                                 |                         | (58 to 83)                              |                         |
| Min–max                          | 0.0 to 100.0                               |                         | 0.0 to 100.0                            |                         |
| 95% CI                           | (72.1, 73.7)                               |                         | (71.7, 73.3)                            |                         |
| <b>End of taxane<sup>a</sup></b> |                                            |                         |                                         |                         |
| <i>n</i>                         | 2114                                       | 2065                    | 2160                                    | 2110                    |
| Mean (SD)                        | 61.9 (20.8)                                | –11.2 (22.8)            | 62.3 (20.5)                             | –10.2 (22.6)            |
| Median                           | 66.7                                       | –8.3                    | 66.7                                    | –8.3                    |
| IQR                              | (50 to 83)                                 | (–25 to 0)              | (50 to 83)                              | (–25 to 0)              |
| Min–max                          | 0.0 to 100.0                               | –100.0 to 75.0          | 0.0 to 100.0                            | –100.0 to 100.0         |
| 95% CI                           | (61.0, 62.8)                               | (–12.2, –10.2)          | (61.5, 63.2)                            | (–11.1, –9.2)           |
| <b>Week 25</b>                   |                                            |                         |                                         |                         |
| <i>n</i>                         | 2085                                       | 2035                    | 2121                                    | 2073                    |
| Mean (SD)                        | 68.9 (19.4)                                | –4.4 (21.6)             | 69.7 (19.2)                             | –2.9 (21.0)             |
| Median                           | 66.7                                       | 0.0                     | 66.7                                    | 0.0                     |
| IQR                              | (58 to 83)                                 | (–17 to 8)              | (58 to 83)                              | (–17 to 8)              |
| Min–max                          | 0.0 to 100.0                               | –100.0 to 75.0          | 0.0 to 100.0                            | –91.7 to 100.0          |
| 95% CI                           | (68.0, 69.7)                               | (–5.3, –3.5)            | (68.9, 70.5)                            | (–3.8, –2.0)            |

End of  
treatment

|           |              |               |              |                |
|-----------|--------------|---------------|--------------|----------------|
| <i>n</i>  | 2313         | 2254          | 2338         | 2282           |
| Mean (SD) | 69.7 (20.0)  | -3.1 (21.9)   | 71.5 (19.6)  | -1.1 (21.8)    |
| Median    | 66.7         | 0.0           | 75.0         | 0.0            |
| IQR       | (58 to 83)   | (-17 to 8)    | (58-83)      | (-17 to 8)     |
| Min-max   | 0.0 to 100.0 | -75.0 to 75.0 | 0.0 to 100.0 | -91.7 to 100.0 |
| 95% CI    | (68.9, 70.5) | (-4.0, -2.2)  | (70.7, 72.3) | (-2.0, -0.2)   |

FU month 18

|           |              |               |              |               |
|-----------|--------------|---------------|--------------|---------------|
| <i>n</i>  | 1953         | 1906          | 1953         | 1918          |
| Mean (SD) | 74.9 (19.0)  | 1.9 (21.5)    | 73.7 (19.3)  | 1.3 (22.2)    |
| Median    | 83.3         | 0.0           | 75.0         | 0.0           |
| IQR       | (67 to 83)   | (-8 to 17)    | (67 to 83)   | (-17 to 17)   |
| Min-max   | 0.0 to 100.0 | -83.3 to 83.3 | 0.0 to 100.0 | -83.3 to 83.3 |
| 95% CI    | (74.1, 75.7) | (0.9, 2.9)    | (72.9, 74.6) | (0.3, 2.3)    |

FU month 24

|           |              |                |              |                 |
|-----------|--------------|----------------|--------------|-----------------|
| <i>n</i>  | 1896         | 1861           | 1902         | 1866            |
| Mean (SD) | 75.4 (19.5)  | 2.2 (22.1)     | 74.9 (19.3)  | 2.4 (22.1)      |
| Median    | 83.3         | 0.0            | 83.3         | 0.0             |
| IQR       | (67 to 83)   | (-8 to 17)     | (67 to 83)   | (-8 to 17)      |
| Min-max   | 0.0 to 100.0 | -100.0 to 75.0 | 0.0 to 100.0 | -100.0 to 100.0 |
| 95% CI    | (74.6, 76.3) | (1.2, 3.2)     | (74.0, 75.7) | (1.4, 3.4)      |

FU month 36

|           |             |            |             |            |
|-----------|-------------|------------|-------------|------------|
| <i>n</i>  | 1855        | 1811       | 1822        | 1782       |
| Mean (SD) | 76.3 (19.1) | 2.8 (21.4) | 74.5 (19.8) | 1.8 (22.5) |
| Median    | 83.3        | 0.0        | 83.3        | 0.0        |
| IQR       | (67 to 92)  | (-8 to 17) | (67 to 83)  | (-8 to 17) |

|         |              |               |              |                |
|---------|--------------|---------------|--------------|----------------|
| Min–max | 0.0 to 100.0 | –83.3 to 91.7 | 0.0 to 100.0 | –100.0 to 75.0 |
| 95% CI  | (75.4, 77.2) | (1.8, 3.8)    | (73.6, 75.4) | (0.7, 2.8)     |

---

Higher scores indicate better health status.

<sup>a</sup>For patients receiving anthracycline-based chemotherapy, the actual time point was week 10 or week 13 of HER2-targeted treatment (depending on the chemotherapy regimen given). For patients receiving non-anthracycline-based chemotherapy (i.e., the pertuzumab plus trastuzumab and docetaxel-carboplatin regimen), this was week 19 of HER2-targeted treatment

*CI* confidence interval, *EORTC QLQ-C30* European Organisation for Research and Treatment of Cancer Quality of Life Questionnaire, Core module, version 3, *FU* follow-up, *IQR* interquartile range, *SD* standard deviation

**Supplementary Table S2.** Summary of the number (%) of patients with a clinically relevant worsening ( $\geq 10$ -point reduction) in the EORTC QLQ C-30 global health status from baseline to each visit.

| Change from baseline to: | Pertuzumab plus trastuzumab and chemotherapy<br><i>n/N (%)</i> | Placebo plus trastuzumab and chemotherapy<br><i>n/N (%)</i> | Relative risk<br>(95% CI) | Odds ratio<br>(95% CI) | Absolute risk reduction<br>(95% CI) |
|--------------------------|----------------------------------------------------------------|-------------------------------------------------------------|---------------------------|------------------------|-------------------------------------|
| End of taxane            | 979/2065 (47.4%)                                               | 973/2110 (46.1%)                                            | 1.03 (0.97, 1.10)         | 1.06 (0.93, 1.19)      | 0.01 (-0.02, 0.04)                  |
| End of treatment         | 591/2031 (29.1%)                                               | 558/2086 (26.7%)                                            | 1.08 (0.98, 1.20)         | 1.12 (0.98, 1.29)      | 0.02 (0.00, 0.05)                   |
| FU month 18              | 444/1906 (23.3%)                                               | 490/1918 (25.5%)                                            | 0.91 (0.81, 1.02)         | 0.89 (0.76, 1.03)      | -0.02 (-0.05, 0.01)                 |
| FU month 36              | 406/1811 (22.4%)                                               | 433/1782 (24.3%)                                            | 0.92 (0.82, 1.04)         | 0.90 (0.77, 1.05)      | -0.02 (-0.05, 0.01)                 |

*CI* confidence interval; *EORTC QLQ-C30* European Organisation for Research and Treatment of Cancer Quality of Life Questionnaire,

Core module, version 3, *FU* follow-up

**Supplementary Table S3.** EORTC QLQ C-30 diarrhoea symptom scores (absolute values and changes from baseline) at each visit.

| Visit                            | Pertuzumab plus trastuzumab and chemotherapy |                      | Placebo plus trastuzumab and chemotherapy |                      |
|----------------------------------|----------------------------------------------|----------------------|-------------------------------------------|----------------------|
|                                  | Value                                        | Change from baseline | Value                                     | Change from baseline |
| <b>Baseline</b>                  |                                              |                      |                                           |                      |
| <i>n</i>                         | 2329                                         |                      | 2339                                      |                      |
| Mean (SD)                        | 5.2 (14.4)                                   |                      | 5.1 (13.5)                                |                      |
| Median                           | 0.0                                          |                      | 0.0                                       |                      |
| IQR                              | (0 to 0)                                     |                      | (0 to 0)                                  |                      |
| Min–max                          | 0.0 to 100.0                                 |                      | 0.0 to 100.0                              |                      |
| 95% CI                           | (4.6, 5.7)                                   |                      | (4.5, 5.6)                                |                      |
| <b>End of taxane<sup>a</sup></b> |                                              |                      |                                           |                      |
| <i>n</i>                         | 2113                                         | 2067                 | 2160                                      | 2111                 |
| Mean (SD)                        | 27.4 (29.2)                                  | 22.3 (29.8)          | 14.4 (22.4)                               | 9.2 (23.9)           |
| Median                           | 33.3                                         | 33.3                 | 0.0                                       | 0.0                  |
| IQR                              | (0 to 33)                                    | (0 to 33)            | (0 to 33)                                 | (0 to 33)            |
| Min–max                          | 0.0 to 100.0                                 | –66.7 to 100.0       | 0.0 to 100.0                              | –100.0 to 100.0      |
| 95% CI                           | (26.1, 28.6)                                 | (21.0, 23.6)         | (13.4, 15.3)                              | (8.2, 10.2)          |
| <b>Week 25</b>                   |                                              |                      |                                           |                      |
| <i>n</i>                         | 2091                                         | 2043                 | 2122                                      | 2075                 |
| Mean (SD)                        | 18.4 (25.4)                                  | 13.2 (26.5)          | 8.2 (17.7)                                | 3.3 (19.8)           |
| Median                           | 0.0                                          | 0.0                  | 0.0                                       | 0.0                  |
| IQR                              | (0 to 33)                                    | (0 to 33)            | (0 to 0)                                  | (0 to 0)             |
| Min–max                          | 0.0 to 100.0                                 | –100.0 to 100.0      | 0.0 to 100.0                              | –100.0 to 100.0      |
| 95% CI                           | (17.3, 19.5)                                 | (12.0, 14.3)         | (7.5, 9.0)                                | (2.4, 4.1)           |
| <b>End of treatment</b>          |                                              |                      |                                           |                      |
| <i>n</i>                         | 2313                                         | 2257                 | 2340                                      | 2285                 |

|             |              |                 |              |                 |
|-------------|--------------|-----------------|--------------|-----------------|
| Mean (SD)   | 17.4 (25.4)  | 12.2 (26.9)     | 8.0 (17.9)   | 2.9 (20.0)      |
| Median      | 0.0          | 0.0             | 0.0          | 0.0             |
| IQR         | (0 to 33)    | (0 to 33)       | (0 to 0)     | (0 to 0)        |
| Min-max     | 0.0 to 100.0 | -100.0 to 100.0 | 0.0 to 100.0 | -100.0 to 100.0 |
| 95% CI      | (16.3, 18.4) | (11.1, 13.4)    | (7.3, 8.8)   | (2.1, 3.8)      |
| FU month 18 |              |                 |              |                 |
| <i>n</i>    | 1952         | 1907            | 1954         | 1919            |
| Mean (SD)   | 4.6 (13.2)   | -0.5 (17.7)     | 5.3 (14.2)   | 0.2 (17.5)      |
| Median      | 0.0          | 0.0             | 0.0          | 0.0             |
| IQR         | (0 to 0)     | (0 to 0)        | (0 to 0)     | (0 to 0)        |
| Min-max     | 0.0 to 100.0 | -100.0 to 100.0 | 0.0 to 100.0 | -100.0 to 100.0 |
| 95% CI      | (4.0, 5.2)   | (-1.3, 0.3)     | (4.7, 5.9)   | (-0.6, 0.9)     |
| FU month 24 |              |                 |              |                 |
| <i>n</i>    | 1896         | 1861            | 1902         | 1868            |
| Mean (SD)   | 4.4 (13.3)   | -0.8 (17.4)     | 5.3 (15.0)   | 0.2 (18.3)      |
| Median      | 0.0          | 0.0             | 0.0          | 0.0             |
| IQR         | (0 to 0)     | (0 to 0)        | (0 to 0)     | (0 to 0)        |
| Min-max     | 0.0 to 100.0 | -100.0 to 100.0 | 0.0 to 100.0 | -100.0 to 100.0 |
| 95% CI      | (3.8, 5.0)   | (-1.6, 0.0)     | (4.7, 6.0)   | (-0.7, 1.0)     |
| FU month 36 |              |                 |              |                 |
| <i>n</i>    | 1855         | 1810            | 1823         | 1784            |
| Mean (SD)   | 4.2 (12.8)   | -0.8 (16.5)     | 5.3 (14.2)   | 0.3 (16.9)      |
| Median      | 0.0          | 0.0             | 0.0          | 0.0             |
| IQR         | (0 to 0)     | (0 to 0)        | (0 to 0)     | (0 to 0)        |
| Min-max     | 0.0 to 100.0 | -100.0 to 100.0 | 0.0 to 100.0 | -100.0 to 100.0 |
| 95% CI      | (3.6, 4.8)   | (-1.5, 0.0)     | (4.7, 6.0)   | (-0.5, 1.1)     |

---

Higher scores indicate a worsening of symptoms.

<sup>a</sup>For patients receiving anthracycline-based chemotherapy, the actual time point was week 10 or week 13 of HER2-targeted treatment (depending on the chemotherapy regimen given). For patients

receiving non-anthracycline-based chemotherapy (i.e., the pertuzumab plus trastuzumab and docetaxel-carboplatin regimen), this was week 19 of HER2-targeted treatment

*CI* confidence interval, *EORTC QLQ-C30* European Organisation for Research and Treatment of Cancer Quality of Life Questionnaire, Core module, version 3, *FU* follow-up, *IQR* interquartile range, *SD* standard deviation
